# Supplementary material for: Antenatal melatonin as an antioxidant in human pregnancies complicated by fetal growth restriction—a phase I pilot clinical trial: study protocol
Source: PubMed Central journal article supplement — BMJ Open. 2013 Dec 21;3(12):e004141. doi: 10.1136/bmjopen-2013-004141 (PMC3884842; doi:10.1136/bmjopen-2013-004141), 2013-12-21
Supplement: bmjopen-2013-004141.draft_revisions.pdf [file bmjopen-2013-004141.draft_revisions.pdf]

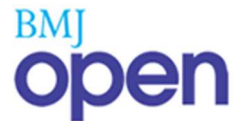

**Antenatal melatonin as an antioxidant in human pregnancies complicated by fetal growth restriction – a phase I pilot clinical trial: study protocol**

|                                 |                                                                                                                                                                                                                                                                                                                                                                                                                                                                                                                                                                                                                                                  |
|---------------------------------|--------------------------------------------------------------------------------------------------------------------------------------------------------------------------------------------------------------------------------------------------------------------------------------------------------------------------------------------------------------------------------------------------------------------------------------------------------------------------------------------------------------------------------------------------------------------------------------------------------------------------------------------------|
| Journal:                        | <i>BMJ Open</i>                                                                                                                                                                                                                                                                                                                                                                                                                                                                                                                                                                                                                                  |
| Manuscript ID:                  | bmjopen-2013-004141                                                                                                                                                                                                                                                                                                                                                                                                                                                                                                                                                                                                                              |
| Article Type:                   | Protocol                                                                                                                                                                                                                                                                                                                                                                                                                                                                                                                                                                                                                                         |
| Date Submitted by the Author:   | 27-Sep-2013                                                                                                                                                                                                                                                                                                                                                                                                                                                                                                                                                                                                                                      |
| Complete List of Authors:       | <p>Alers, Nicole; Monash University, The Ritchie Centre, Monash Institute of Medical Research; Monash University, Department of Obstetrics and Gynaecology</p> <p>Jenkin, Graham; Monash University, The Ritchie Centre, Monash Institute of Medical Research; Monash University, Department of Obstetrics and Gynaecology</p> <p>Miller, Suzanne; Monash University, The Ritchie Centre, Monash Institute of Medical Research; Monash University, Department of Obstetrics and Gynaecology</p> <p>Wallace, Euan; Monash University, The Ritchie Centre, Monash Institute of Medical Research; Monash University, Obstetrics and Gynaecology</p> |
| <b>Primary Subject Heading</b>: | Obstetrics and gynaecology                                                                                                                                                                                                                                                                                                                                                                                                                                                                                                                                                                                                                       |
| Secondary Subject Heading:      | Obstetrics and gynaecology                                                                                                                                                                                                                                                                                                                                                                                                                                                                                                                                                                                                                       |
| Keywords:                       | Fetal medicine < OBSTETRICS, Maternal medicine < OBSTETRICS, OBSTETRICS                                                                                                                                                                                                                                                                                                                                                                                                                                                                                                                                                                          |
|                                 |                                                                                                                                                                                                                                                                                                                                                                                                                                                                                                                                                                                                                                                  |

SCHOLARONE™  
Manuscripts

1  
2  
3 **Title:** Antenatal melatonin as an antioxidant in human pregnancies complicated  
4  
5 by fetal growth restriction – a phase I pilot clinical trial: study protocol  
6  
7

8  
9  
10  
11 **Authors:** <sup>1,2</sup>Nicole O Alers, <sup>1,2</sup>Graham Jenkin, <sup>1,2</sup>Suzanne L Miller, <sup>1,2,3</sup>Euan M  
12  
13 Wallace  
14  
15

16  
17  
18 **Institutions:** <sup>1</sup>The Ritchie Centre, Monash Institute of Medical Research and  
19  
20 <sup>2</sup>Department of Obstetrics and Gynaecology, Monash University; <sup>3</sup>Monash  
21  
22 Women's Services, Monash Health, Clayton, Victoria, Australia.  
23  
24  
25

26  
27  
28 **Corresponding author:** Professor Euan M Wallace, Department of Obstetrics  
29  
30 and Gynaecology, Monash University, Monash Medical Centre, 246 Clayton Road,  
31  
32 Clayton, Victoria 3168, Australia. Tel: +613 9594 5145. Fax: +613 9594 5003.  
33  
34 E-mail: euan.wallace@monash.edu  
35  
36

37  
38  
39 **Keywords:** Fetal growth restriction, melatonin, clinical trial, oxidative stress,  
40  
41 antenatal neuroprotection.  
42  
43

44  
45  
46 **Word count:** 2, 406.  
47  
48  
49  
50  
51  
52  
53  
54  
55  
56  
57  
58  
59  
60

**ABSTRACT**

**Background:** Fetal growth restriction complicates about 5% of pregnancies and is commonly caused by placental dysfunction. It is associated with increased risks of perinatal mortality and short- and long-term morbidity, such as cerebral palsy. Chronic *in utero* hypoxiaemia, inflammation and oxidative stress are likely culprits contributing to the long-term neurological sequelae of fetal growth restriction. In this regard we propose that melatonin, a powerful antioxidant, might mitigate morbidity and/or mortality associated with fetal growth restriction. Melatonin has an excellent biosafety profile and crosses the placenta and blood brain barrier. We present the protocol for a phase I clinical trial to investigate the efficacy of maternal oral melatonin administration in women with a pregnancy complicated by fetal growth restriction.

**Methods and analysis:** The proposed trial is a single-arm open-label clinical trial involving 12 women. Severe, early onset fetal growth restriction will be diagnosed by estimated fetal weight  $\leq 10^{\text{th}}$  centile in combination with abnormal fetoplacental Doppler studies, occurring before 34 weeks of pregnancy. Baseline measurements of maternal and fetal wellbeing, levels of oxidative stress and ultrasound and Doppler measurements will be obtained at the time of diagnosis of fetal growth restriction. Women will then commence melatonin treatment (4mg) twice daily until birth. The primary outcomes are the levels of oxidative stress in the maternal and fetal circulation and placenta. Secondary outcomes are fetoplacental Doppler studies (uterine artery, middle cerebral artery, and ductus

1  
2  
3 venous), fetal biometry, fetal biophysical profile and a composite determination  
4  
5 of neonatal outcome. A historical cohort of gestational matched fetal growth  
6  
7 restriction and a healthy pregnancy cohort will be used as comparators.  
8  
9

10  
11  
12 **Ethics and dissemination:** Ethical approval has been obtained from Monash  
13  
14 Health Human Research Ethics Committee B (HREC12133B). Data will be  
15  
16 presented at international conferences and published in peer-reviewed journals.  
17  
18

19  
20  
21 **Trial registration number:** Clinical Trials, protocol registration system:  
22  
23 NCT01695070.  
24  
25  
26  
27  
28  
29  
30  
31  
32  
33  
34  
35  
36  
37  
38  
39  
40  
41  
42  
43  
44  
45  
46  
47  
48  
49  
50  
51  
52  
53  
54  
55  
56  
57  
58  
59  
60

## ARTICLE SUMMARY

### Article focus:

- This trial aims to establish the clinical and/or biochemical benefit of maternally administered melatonin as an antioxidant treatment in pregnancies affected by fetal growth restriction.
- Specific aims are:
  - To determine the effect of daily maternal oral melatonin on levels of oxidative stress in the placenta and in the maternal and fetal circulation in pregnancies affected by early onset fetal growth restriction.
  - To determine the effect of daily maternal oral melatonin on the clinical outcomes of pregnancies affected by early onset fetal growth restriction.
  - To determine the effect of daily maternal oral melatonin on brain injury and neurologic development in growth restricted newborn babies.

### Key messages:

- Fetal growth restriction is a serious pregnancy complication and is associated with significant fetal and neonatal morbidity and mortality. Fetal brain injury is common in fetal growth restriction.

- Brain injury in survivors of fetal growth restriction is likely to originate antenatally as a consequence of oxidative stress.
- There are currently no established treatments for fetal growth restriction or for neuroprotection in fetal growth restriction.
- Numerous animal studies have established the use of melatonin as an antenatal antioxidant and neuroprotectant in acute and chronic hypoxia. In this study we aim to explore whether melatonin is an effective antioxidant in the treatment of human fetal growth restriction.

#### Strengths and limitations of this study:

- This pilot study has an appropriate design, and includes sufficient participants, to achieve measureable outcomes. Extensive previous human and animal studies form the basis for the design of this trial.
- This pilot study is the first of its kind in the world. Being a pilot study, this trial lacks randomisation and a placebo group, although comparator groups are included. If this trial is successful, results will be used to inform future randomized controlled trials.

## INTRODUCTION

Fetal growth restriction (FGR) defines the fetus that does not realise its normal growth potential. This significant pregnancy complication accounts for about 5 percent of all pregnancies(1). FGR is most commonly caused by placental dysfunction(2). FGR is strongly associated with increased risks of preterm birth, perinatal death, and, among survivors, significant cardiovascular and neurological morbidities, including cerebral palsy(3-7).

State-of-the-art fetal surveillance techniques are important in the diagnosis and surveillance of the growth restricted fetus, and afford timely delivery. However, with the exception of antenatal glucocorticoids there are currently no treatments to reduce the short- and long-term morbidities associated with FGR(8). In FGR, injury to the developing fetal brain is likely to principally occur *in utero*, emphasizing that, if the burden of neurological morbidity is to be reduced, then antenatal neuroprotective treatment, as opposed to postnatal therapy, will be necessary. Thus, future treatment should be directed at protecting fetal brain development and reducing the incidence of brain injury before birth rather than solely focusing on care in the nursery.

Although many *in utero* events can perturb normal fetal brain development, it is thought that chronic fetoplacental hypoxaemia and oxidative stress are the likely key mechanisms initiating pathways leading to brain injury(9). In placental dysfunction, the placenta is exposed to recurrent ischaemia-reperfusion injury, ultimately leading to decreased placental oxygen transfer capacity.

Consequently, the placenta cannot adequately meet the growing metabolic needs

1  
2  
3 of the fetus, which in turn becomes progressively hypoxaemic. Compensatory  
4 fetal mechanisms attempt to maintain adequate oxygenation, particularly of the  
5 heart and brain. Nevertheless, these eventually fail and a complex cascade of  
6 metabolic events is initiated that involves the generation of nitrogen and oxygen  
7 free radicals(10).  
8  
9

10  
11  
12 The central nervous system, and in particular the fetal brain, is particularly  
13 susceptible to free radical damage(11). Low antioxidant defenses and abundant  
14 iron within the fetal brain render it vulnerable to oxidative stress. Further, the  
15 fetal brain is rich in membrane lipids that are sensitive to free radical attack.  
16

17 Indeed, lipid peroxidation plays an important role in neuronal and white matter  
18 damage directly and indirectly. Byproducts of lipid peroxidation can trigger  
19 vasoconstriction(12), and are cytotoxic, mutagenic and teratogenic(13–15).  
20

21 Magnetic resonance imaging of preterm infants with white matter injury show  
22 significantly higher levels of protein and lipid peroxidation(16). Furthermore, in  
23 an autopsy study on human brain tissue, activated microglia, significant protein  
24 nitration, lipid peroxidation and cell injury were all detected in premyelinating  
25 oligodendrocytes in babies diagnosed with periventricular leukomalacia(17).  
26  
27  
28

29 Melatonin (5-methoxy-N-acetyltryptamine) is an endogenous lipid-soluble  
30 hormone, predominantly produced in the pineal gland that is best recognized for  
31 its role in providing circadian and seasonal timing cues. It is also a strong  
32 antioxidant. It effectively scavenges free radicals, induces endogenous  
33 antioxidant enzymes, such as glutathione peroxidase and glutathione  
34 reductase(18), and inhibits the pro-oxidative enzyme nitric oxide synthase(19).  
35  
36  
37

38 Melatonin also stabilizes cell membranes, enhancing their resistance to oxidative  
39  
40  
41  
42  
43  
44  
45  
46  
47  
48  
49  
50  
51  
52  
53  
54  
55  
56  
57  
58  
59  
60



1  
2  
3 damage(20). Due to its strong antioxidant capacity and its ability to cross the  
4  
5 human placenta(21) and blood-brain barrier(22), melatonin is of particular  
6  
7 interest as a candidate antenatal neuroprotectant. The neuroprotective potential  
8  
9 of melatonin is augmented by the fact that melatonin inhibits norepinephrine-  
10  
11 induced middle cerebral artery constriction(23) and induces umbilical  
12  
13 vasodilation(24) in ovine models of fetal growth restriction. We have shown that  
14  
15 melatonin treatment before and during transient severe fetal asphyxia  
16  
17 prevented the formation of hydroxyl radicals within the fetal brain(25), reduced  
18  
19 lipid peroxidation and cell death and stabilized the blood-brain-barrier(26).  
20  
21 Administration of melatonin at the time of induced hypoxia in the fetal sheep  
22  
23 brain also reduced inflammation and cell death(27). Using an established ovine  
24  
25 model of fetal growth restriction(28), we have now shown that maternal  
26  
27 administration of melatonin reduced fetal hypoxia, improved  
28  
29 neurodevelopment and decreased brain injury and oxidative stress in newborn  
30  
31 lambs(*SL Miller, unpublished data 2013*).

32  
33  
34  
35  
36  
37  
38 Melatonin treatment during human pregnancy has been studied for a large range  
39  
40 of conditions and at different times during gestation. Predominantly, melatonin  
41  
42 has been studied in assisted reproductive technology, aiming to improve oocyte  
43  
44 quality and pregnancy rates following *in vitro* fertilization (IVF). Melatonin  
45  
46 administration, commenced prior to IVF-cycles and continued during pregnancy,  
47  
48 was associated with modestly improved pregnancy outcomes(29–31).  
49  
50 Importantly, all babies that were born from melatonin-treated pregnancies were  
51  
52 born healthy and with no congenital abnormalities. (*V. Unfer, personal*

1  
2  
3 *communication, 2012*). Furthermore, maternal treatment with melatonin  
4  
5 significantly boosts placental antioxidant enzyme gene expression(21).  
6  
7

8  
9 Except for its known, benign effects on sleep dynamics, melatonin does not exert  
10 acute pharmacological effects on the nervous or vascular system. A median lethal  
11 dose in mice could not be calculated because an increased mortality rate was not  
12 observed, even following extremely high doses of up to 800mg/kg  
13 melatonin(32). Long term nightly oral treatment with 75mg melatonin in 1400  
14 non-pregnant women did not cause any serious adverse effects(33). To our  
15 knowledge, no maternal and/or developmental toxicity effects, due to melatonin  
16 treatment, have been reported. The maternal no adverse effect level (NOAEL)  
17 and lowest observed adverse effect level were established at 100 and  
18 200mg/kg/day, respectively, for maternally administered melatonin in pregnant  
19 rats. The developmental toxicity NOAEL was  $\geq 200$ mg/kg/day(34).  
20  
21  
22  
23  
24  
25  
26  
27  
28  
29  
30  
31  
32  
33

34 **Rationale:** Fetal growth restriction is a serious pregnancy complication,  
35 affecting up to 5% of pregnancies. It is associated with significant fetal and  
36 neonatal mortality and morbidity, including neurological impairment. Even  
37 though modern obstetrics allows for careful fetal monitoring, there are neither  
38 effective therapies for fetal growth restriction nor established options for  
39 antenatal neuroprotection in fetal growth restriction. Numerous animal studies  
40 have established the use of melatonin as an effective antenatal antioxidant and  
41 neuroprotectant in acute and chronic hypoxia. In this trial we aim to explore, for  
42 the first time, whether melatonin is an effective antioxidant in human fetal  
43 growth restriction.  
44  
45  
46  
47  
48  
49  
50  
51  
52  
53  
54  
55  
56  
57  
58  
59  
60

1  
2  
3 **Aims:** We will establish the clinical and/or biochemical benefit of maternally  
4 administered melatonin as an antioxidant treatment in pregnancies affected by  
5 fetal growth restriction.  
6  
7  
8

9  
10 Specific aims are:

- 11  
12  
13  
14 1. To determine the effect of daily maternal oral melatonin on markers of  
15 oxidative stress in the placenta, and maternal and fetal circulations in  
16 pregnancies affected by early onset fetal growth restriction.  
17  
18  
19 2. To determine the effect of daily maternal oral melatonin on the clinical  
20 outcomes of pregnancies affected by early onset fetal growth restriction.  
21  
22  
23 3. To determine the effect of daily maternal oral melatonin on brain injury and  
24 neurodevelopment in growth restricted newborn babies.  
25  
26  
27  
28  
29  
30  
31  
32  
33

## 34 **METHODS AND ANALYSIS**

35  
36  
37 **Study design:** Phase I single-arm open label clinical trial, with historic cohorts of  
38 FGR and healthy pregnancies as comparators.  
39  
40  
41  
42  
43

44 **Subjects:** Twelve women (pregnancies) with fetal growth restriction will be  
45 recruited and studied to completion of the trial. A historical cohort of gestational  
46 matched fetal growth restriction and a healthy pregnancy cohort will be used as  
47 comparators.  
48  
49  
50  
51  
52  
53  
54  
55  
56  
57  
58  
59  
60

1  
2  
3 **Patient eligibility:** Pregnant women with a singleton growth restricted fetus at  
4  
5 less than 34 weeks. Fetal growth restriction will be defined as a sonographic  
6  
7 estimated fetal weight at or below the 10<sup>th</sup> centile for gestational age in  
8  
9 combination with at least one abnormal fetoplacental Doppler study of the  
10  
11 uterine artery, umbilical artery, middle cerebral artery or ductus venosus.  
12  
13 Women with a multiple pregnancy, or a pregnancy affected by maternal or fetal  
14  
15 infection, or with a fetus with a chromosomal or major structural anomaly or  
16  
17 non-placental fetal growth restriction will be excluded from this trial.  
18  
19

20  
21  
22  
23 **Recruitment, interventions and procedures:** Patients will be recruited from  
24  
25 the maternity services of Monash Health and Jessie McPherson Private Hospital,  
26  
27 Melbourne, Australia. The study will be staffed with a clinical research team, who  
28  
29 will inform potential participants about the aims, methods and potential risks  
30  
31 and benefits of this study. Subjects will be informed that their participation is  
32  
33 voluntary and that they may withdraw consent to participate at any time during  
34  
35 the study, and for any reason, and that choosing not to participate or withdraw  
36  
37 will not affect their care. An information form about the trial and opportunities  
38  
39 to ask questions will be offered to the woman and any other person(s) she  
40  
41 chooses. Women will be recruited to the study following written informed  
42  
43 consent. Clinical details of pregnancy, delivery and neonatal outcomes will be  
44  
45 recorded in pre-specified case record forms.  
46  
47  
48  
49

50  
51  
52 Following recruitment, and until delivery, women will receive oral melatonin  
53  
54 (Circadin®, Neurim Pharmaceuticals), 4mg twice daily (a total daily dose of 8mg)  
55  
56 approximately 12 hours apart. Prior to starting melatonin, a maternal blood  
57  
58  
59  
60

1  
2  
3 sample will be taken and ultrasound and Doppler measurements will be  
4  
5 obtained. This will be repeated once per week until birth. Immediately prior to  
6  
7 birth, a maternal blood sample will be obtained. At the time of birth, samples of  
8  
9 the amniotic fluid, umbilical cord blood and placenta will be collected.  
10  
11 Clinical data regarding maternal wellbeing, pregnancy and fetal and neonatal  
12  
13 outcomes will be recorded as the trial proceeds.  
14  
15  
16  
17  
18

19 **Outcome measures:** The primary outcome will be the level of oxidative stress in  
20  
21 the placenta and in the maternal (before and during treatment and at delivery)  
22  
23 and fetal (umbilical artery and vein at delivery) circulations, as reflected by the  
24  
25 measurement of malondialdehyde, 8-isoprostane, total antioxidant capacity and  
26  
27 superoxide dismutase. Serum levels of melatonin will be measured in maternal  
28  
29 and fetal blood.  
30  
31  
32  
33

34  
35 The secondary outcome measures will include clinical parameters about the  
36  
37 pregnancy and its duration, fetal and neonatal wellbeing, mortality and  
38  
39 morbidity (Tables 1-4).  
40  
41  
42  
43  
44  
45  
46  
47  
48  
49  
50  
51  
52  
53  
54  
55  
56  
57  
58  
59  
60

**Table 1: Ultrasound and Doppler measurements.**

---

**Doppler and ultrasound measurements:** at recruitment and then weekly until delivery.

---

Doppler velocimetry: umbilical artery, middle cerebral artery, ductus venosus, and maternal uterine arteries

Biometry (fortnightly)

Amniotic fluid index

Fetal behaviour: heart rate, tone, breathing, gross body movements

---

**Table 2: Maternal morbidity.**

---

**Markers of maternal morbidity:** at recruitment and at least weekly until delivery.

---

Blood pressure

Complete blood count

Liver function tests (AST, ALT, GTT, bilirubin)

Renal function tests (urea, creatinine)

---

**Table 3: Pregnancy end-points****Pregnancy outcomes:**


---

Gestational age at birth

Diagnosis to delivery interval

Abnormal cardiotocogram

Indication for delivery (if not spontaneous)

Mode of birth

Labour analgesia/anaesthesia

Duration of labour stages

Duration of membrane rupture to birth

Use of antihypertensives

Use of magnesium sulphate

Use of corticosteroids

---

**Table 4: Neonatal outcomes.****Neonatal outcomes:**


---

Sex

Apgar scores (1, 5, 10 minutes)

Birth weight

Cord artery S100B

Head circumference at birth

Composite neonatal outcome: admission to neonatal intensive care unit,  
duration of admission, need for and duration of respiratory support,  
intraventricular haemorrhage, necrotizing enterocolitis, abnormal neurology,

---

mortality prior to discharge

---

**Follow up of women and infants:** Participants will be followed weekly for the duration of the trial. The routine clinical care of participants, including ultrasound scans, will not be affected by participation in the study. During the weekly follow-up, fetal and maternal wellbeing will be assessed and women will discuss any issues that they have experienced. Medication will be supplied weekly to meet the requirements for the following week. Women will be asked to keep a medication and symptom diary (drowsiness, sleepiness, general physical well-being, time of melatonin intake), which will be reviewed weekly by the principal investigator. Melatonin treatment will cease as soon as birth has occurred. Postnatal clinical care of the women will be the responsibility of the attending obstetric team. The principal investigator will assess the clinical condition of participants daily during the first three days post-partum, to ensure that no problems become apparent in response to withdrawal from treatment. Clinical data will be obtained from neonates who require admission to the neonatal intensive care unit. Long-term follow-up using neurodevelopmental examination and questionnaires and MRI scans, are desirable but will depend on funding.

**Sample size and statistical analysis of data:** This study is a proof-of-principle phase I trial. As such, there are no current data available to undertake a formal power calculation to determine the sample size. If successful, this exploratory study will provide the measures needed to perform the power calculations



1  
2  
3 required for the planned phase II randomized-controlled trial. This trial will  
4  
5 provide data for the establishment of the use of maternal melatonin treatment in  
6  
7 fetal growth restriction.  
8

9  
10 The results obtained in this trial will be compared to historic cohorts of  
11  
12 untreated fetal growth restriction and healthy pregnancies, which we have been  
13  
14 collecting since 2011, using the same protocol.  
15

16  
17 Biomarkers of oxidative stress in the maternal blood samples will be analysed  
18  
19 using a repeated measures analysis of variance, including the baseline value as a  
20  
21 covariate. It is assumed that the effect of treatment with melatonin on levels of  
22  
23 oxidative stress will not depend on duration of treatment. However, secondary  
24  
25 analysis will be performed to determine the effect of treatment duration on  
26  
27 biomarkers of oxidative stress. If the treatment duration significantly impacts on  
28  
29 the effect of melatonin on the oxidative stress status, this will be further  
30  
31 investigated using the least-square measure. Data will be plotted as mean scores  
32  
33 over time.  
34  
35  
36  
37  
38

39  
40 Biomarkers of oxidative stress in the maternal blood samples will be analysed  
41  
42 using a repeated measures analysis of variance, including the baseline value as a  
43  
44 covariate. Levels of oxidative stress in the maternal blood sample obtained  
45  
46 immediately prior to birth will be compared to samples derived from the historic  
47  
48 cohorts using a one-way ANOVA. Levels of oxidative stress and brain injury will  
49  
50 be compared to data obtained from the previously described historic cohorts.  
51  
52 Clinical data regarding maternal wellbeing, pregnancy outcome and neonatal  
53  
54 outcome will be compared to the same cohorts. These data will be analysed using  
55  
56 a one-way ANOVA.  
57  
58  
59  
60

1  
2  
3  
4  
5 A p-value  $\leq 0.05$  is considered to be statistically significant.  
6  
7  
8

9  
10 **Adverse events and safety monitoring:** During the treatment period, clinical  
11 care will remain unchanged and will be the responsibility of uninvolved medical  
12 staff. The principal investigator will monitor all participants weekly, take a brief  
13 medical history, measure blood pressure and interpret ultrasound scan results  
14 (obtained by uninvolved staff) to ensure melatonin treatment can be safely  
15 continued. A weekly blood sample will be obtained to perform a full blood  
16 examination, assess liver and renal function and assess C-reactive protein. For  
17 the duration of the trial, the principal investigator will be contactable by  
18 telephone at all times.  
19  
20  
21  
22  
23  
24  
25  
26  
27  
28

29  
30 Any adverse medical events reported by the patient will be recorded in the  
31 patients' medical records at each visit. Serious adverse events occurring after  
32 initiation of the trial will be reported to the Monash Health Human Research  
33 Ethics committee, Therapeutics Committee and Therapeutic Goods  
34 Administration of Australia's Office of Scientific Evaluation within 72 hours.  
35  
36  
37  
38  
39  
40  
41  
42  
43

#### 44 **Trial discontinuation or modification**

45  
46 The participants can end participation at their own request at any time.  
47  
48 Participants will be withdrawn from the trial if they or their fetus suffer from an  
49 unexpected serious adverse event. Worsening of fetoplacental Doppler  
50 velocimetry or fetal growth are within the natural history of fetal growth  
51 restriction and are not part of the discontinuation criteria.  
52  
53  
54  
55  
56  
57  
58  
59  
60

1  
2  
3 **Ethics and dissemination:** This study has been approved by the Monash Health  
4  
5 Human Research Ethics Committee B (HREC 12133B). Data will be presented at  
6  
7 relevant conferences and published in peer-reviewed journals.  
8  
9

## 10 11 12 **DISCUSSION**

13  
14  
15  
16  
17 The use of melatonin as an antenatal antioxidant therapy in fetal growth  
18  
19 restriction has been proposed as a promising and safe option to protect the fetal  
20  
21 brain from injury. This trial is essential to confirm the antioxidant capacity and  
22  
23 safety of melatonin treatment. If this study confirms that maternal melatonin can  
24  
25 decrease maternal, fetal and/or placental levels of oxidative stress, we will  
26  
27 proceed to a phase II randomized-controlled trial to assess the effect of maternal  
28  
29 melatonin treatment on brain injury and neurodevelopment. In addition,  
30  
31 melatonin treatment could also potentially be used as an antenatal  
32  
33 neuroprotectant in other compromised pregnancies or in threatened preterm  
34  
35 birth to protect the mother and/or fetus. Finally, if melatonin treatment indeed  
36  
37 strengthens antioxidant defenses during pregnancy, it might be a suitable new  
38  
39 strategy in the management of pre-eclampsia. A phase I study to study the  
40  
41 clinical and biochemical benefit of melatonin treatment in preeclampsia has been  
42  
43 initiated(35).  
44  
45  
46  
47  
48  
49  
50

## 51 **AUTHORS' CONTRIBUTIONS**

52  
53  
54  
55 NOA: research, contribution of original material, editing and approval of final  
56  
57 manuscript. SLM, GJ, EMW: editing and approval of final manuscript.  
58  
59  
60

1  
2  
3  
4  
5  
6  
7  
8  
9  
10  
11  
12  
13  
14  
15  
16  
17  
18  
19  
20  
21  
22  
23  
24  
25  
26  
27  
28  
29  
30  
31  
32  
33  
34  
35  
36  
37  
38  
39  
40  
41  
42  
43  
44  
45  
46  
47  
48  
49  
50  
51  
52  
53  
54  
55  
56  
57  
58  
59  
60

**FUNDING STATEMENT**

This work was supported by the 5Point Foundation.

**COMPETING INTERESTS**

NOA is funded by a Monash Graduate Scholarship and a Monash International Postgraduate Research Scholarship.

**REFERENCES**

1. Robert R. Intrauterine growth restriction. *Obstet Gynecol.* 2002 Mar;99(3):490--496.
2. Warkany J, Monroe BB, Sutherland BS. Intrauterine Growth Retardation. *Am J Dis Child.* 1961 Aug;102(2):249-79.
3. Chase HC. A study of infant mortality from linked records: comparison of neonatal mortality from two cohort studies. United States, January-March 1950 and 1960. *Vital Health Stat 20 Data Natl Vital Stat Syst.* 1972 Jun;13:1--99.
4. Ghidini A. Doppler of the Ductus Venosus in Severe Preterm Fetal Growth Restriction. *Obstet Gynecol.* 2007 Feb;109(2, Part 1):250-2.
5. Bernstein IM, Horbar JD, Badger GJ, Ohlsson A, Golan A. Morbidity and mortality among very-low-birth-weight neonates with intrauterine growth restriction. The Vermont Oxford Network. *Am J Obstet Gynecol.* 2000 Jan;182(1 Pt 1):198--206.
6. Ross MG, Beall MH. Adult Sequelae of Intrauterine Growth Restriction. *Semin Perinatol.* 2008 Jun;32(3):213-8.
7. Barker DJ. In utero programming of chronic disease. *Clin Sci Lond Engl* 1979. 1998 Aug;95(2):115-28.

- 1  
2  
3 8. Miller SL, Wallace EM. Effect of Antenatal Steroids on Haemodynamics in  
4 the Normally Grown and Growth Restricted Fetus. *Curr Pediatr Rev.* 2013  
5 Feb 1;9(1):67–74.  
6  
7
- 8  
9  
10 9. Miller SL, Wallace EM, Walker DW. Antioxidant Therapies: A Potential Role  
11 in Perinatal Medicine. *Neuroendocrinology* [Internet]. 2012 [cited 2012 Apr  
12 19]; Available from: <http://dx.doi.org/10.1159/000336378>  
13  
14  
15
- 16  
17  
18 10. Love S. Oxidative stress in brain ischemia. *Brain Pathol Zurich Switz.* 1999  
19 Jan;9(1):119–31.  
20  
21  
22
- 23  
24 11. Halliwell B. Reactive oxygen species and the central nervous system. *J*  
25 *Neurochem.* 1992 Nov;59(5):1609–23.  
26  
27  
28
- 29  
30 12. Morrow JD, Minton TA, Roberts II LJ. The F<sub>2</sub>-isoprostane, 8-epi-  
31 prostaglandin F<sub>2</sub> $\alpha$ , a potent agonist of the vascular  
32 thromboxane/endoperoxide receptor, is a platelet  
33 thromboxane/endoperoxide receptor antagonist. *Prostaglandins.* 1992  
34 Aug;44(2):155–63.  
35  
36  
37
- 38  
39 13. Schmidt H, Grune T, Müller R, Siems WG, Wauer RR. Increased levels of lipid  
40 peroxidation products malondialdehyde and 4-hydroxynonenal after  
41 perinatal hypoxia. *Pediatr Res.* 1996 Jul;40(1):15–20.  
42  
43  
44
- 45  
46 14. Wentzel P, Eriksson UJ. 8-Iso-PGF<sub>2</sub> $\alpha$  administration generates  
47 dysmorphogenesis and increased lipid peroxidation in rat embryos in vitro.  
48 *Teratology.* 2002;66(4):164–8.  
49  
50  
51  
52  
53  
54  
55  
56  
57  
58  
59  
60

- 1  
2  
3 15. Marnett LJ. Lipid peroxidation—DNA damage by malondialdehyde. *Mutat*  
4  
5 *Res Mol Mech Mutagen*. 1999 Mar;424(1-2):83–95.  
6  
7
- 8  
9 16. Inder T, Mocatta T, Darlow B, Spencer C, Volpe JJ, Winterbourn C. Elevated  
10  
11 free radical products in the cerebrospinal fluid of VLBW infants with  
12  
13 cerebral white matter injury. *Pediatr Res*. 2002 Aug;52(2):213–8.  
14  
15
- 16  
17 17. Haynes RL, Folkert RD, Keefe RJ, Sung I, et al. Nitrosative and oxidative  
18  
19 injury to premyelinating oligodendrocytes in periventricular leukomalacia. *J*  
20  
21 *Neuropathol Exp Neurol*. 2003 May;62(5):441–50.  
22  
23
- 24  
25 18. Pablos MI, Chuang J, Reiter RJ, Ortiz GG, Daniels WM, Sewerynek E, et al.  
26  
27 Time course of the melatonin-induced increase in glutathione peroxidase  
28  
29 activity in chick tissues. *Biol Signals*. 1995;4(6):325–30.  
30  
31
- 32  
33 19. Pozo D, Reiter RJ, Calvo JR, Guerrero JM. Inhibition of cerebellar nitric oxide  
34  
35 synthase and cyclic GMP production by melatonin via complex formation  
36  
37 with calmodulin. *J Cell Biochem*. 1997 Jun;65(3):430–42.  
38  
39
- 40  
41 20. García JJ, Reiter RJ, Guerrero JM, Escames G, Yu BP, Oh CS, et al. Melatonin  
42  
43 prevents changes in microsomal membrane fluidity during induced lipid  
44  
45 peroxidation. *FEBS Lett*. 1997 May;408(3):297–300.  
46  
47
- 48  
49 21. Okatani Y, Okamoto K, Hayashi K, Wakatsuki A, Tamura S, Sagara Y.  
50  
51 Maternal-fetal transfer of melatonin in pregnant women near term. *J Pineal*  
52  
53 *Res*. 1998 Nov;25(3):129–34.  
54  
55  
56  
57  
58  
59  
60

- 1  
2  
3 22. Okatani Y, Wakatsuki A, Kaneda C. Melatonin increases activities of  
4 glutathione peroxidase and superoxide dismutase in fetal rat brain. *J Pineal*  
5 *Res.* 2000 Mar;28(2):89-96.  
6  
7  
8  
9  
10  
11 23. Torres-Farfan C, Valenzuela FJ, Mondaca M, Valenzuela GJ, Krause B,  
12 Herrera EA, et al. Evidence of a role for melatonin in fetal sheep physiology:  
13 direct actions of melatonin on fetal cerebral artery, brown adipose tissue  
14 and adrenal gland. *J Physiol.* 2008 Aug;586(16):4017-27.  
15  
16  
17  
18  
19  
20  
21 24. Thakor AS, Herrera EA, Serón-Ferré M, Giussani DA. Melatonin and vitamin  
22 C increase umbilical blood flow via nitric oxide-dependent mechanisms. *J*  
23 *Pineal Res.* 2010 Nov;49(4):399-406.  
24  
25  
26  
27  
28  
29 25. Miller SL, Yan EB, Castillo-Melendez M, Jenkin G, Walker DW. Melatonin  
30 Provides Neuroprotection in the Late-Gestation Fetal Sheep Brain in  
31 Response to Umbilical Cord Occlusion. *Dev Neurosci.* 2005;27(2-4):200-10.  
32  
33  
34  
35  
36  
37 26. Yawno T, Castillo-Melendez M, Jenkin G, Wallace EM, Walker DW, Miller SL.  
38 Mechanisms of melatonin-induced protection in the brain of late gestation  
39 fetal sheep in response to hypoxia. *Dev Neurosci.* 2012;34(6):543-51.  
40  
41  
42  
43  
44 27. Welin A-K, Svedin P, Lapatto R, Sultan B, Hagberg H, Gressens P, et al.  
45 Melatonin Reduces Inflammation and Cell Death in White Matter in the Mid-  
46 Gestation Fetal Sheep Following Umbilical Cord Occlusion. *Pediatr Res.*  
47  
48  
49  
50  
51  
52  
53  
54  
55  
56  
57  
58  
59  
60



- 1  
2  
3 28. Supramaniam VG, Jenkin G, Loose J, Wallace EM, Miller SL. Chronic fetal  
4 hypoxia increases activin A concentrations in the late-pregnant sheep. BJOG  
5  
6 Int J Obstet Gynaecol. 2006 Jan;113(1):102-9.  
7  
8  
9  
10  
11 29. Unfer V, Raffone E, Rizzo P, Buffo S. Effect of a supplementation with myo-  
12  
13 inositol plus melatonin on oocyte quality in women who failed to conceive  
14  
15 in previous in vitro fertilization cycles for poor oocyte quality: a  
16  
17 prospective, longitudinal, cohort study. Gynecol Endocrinol. 2011  
18  
19 Nov;27(11):857-61.  
20  
21  
22  
23 30. Tamura H, Nakamura Y, Terron MP, Flores LJ, Manchester LC, Tan D-X, et al.  
24  
25 Melatonin and pregnancy in the human. Reprod Toxicol. 2008  
26  
27 Apr;25(3):291-303.  
28  
29  
30  
31 31. Benedetto PPRERV. Effect of the treatment with myo-inositol plus folic acid  
32  
33 plus melatonin in comparison with a treatment with myo-inositol plus folic  
34  
35 acid on oocyte quality and pregnancy outcome in IVF cycles. A prospective,  
36  
37 clinical trial. Eur Rev Med Pharmacol Sci. 2010 Jun;14(6):555.  
38  
39  
40  
41 32. Barchas J, Dacosta F, Spector S. Acute Pharmacology of Melatonin. Nature.  
42  
43 1967 May;214(5091):919--920.  
44  
45  
46  
47 33. Silman RE. Melatonin: a contraceptive for the nineties. Eur J Obstet Gynecol  
48  
49 Reprod Biol. 1993 Apr;49(1-2):3-9.  
50  
51  
52 34. Jahnke G, Marr M, Myers C, Wilson R, Travlos G, Price C. Maternal and  
53  
54 developmental toxicity evaluation of melatonin administered orally to  
55  
56  
57  
58  
59  
60

1  
2  
3 pregnant Sprague-Dawley rats. Toxicol Sci Off J Soc Toxicol. 1999  
4  
5 Aug;50(2):271-9.  
6  
7

- 8  
9 35. Hobson SR, Lim R, Gardiner EE, Alers NO, Wallace EM. Phase I pilot clinical  
10 trial of antenatal maternally administered melatonin to decrease the level of  
11 oxidative stress in human pregnancies affected by pre-eclampsia (PAMPR):  
12 study protocol. BMJ Open. 2013 Jan 9;3(9):e003788.  
13  
14  
15  
16  
17  
18  
19  
20  
21  
22  
23  
24  
25  
26  
27  
28  
29  
30  
31  
32  
33  
34  
35  
36  
37  
38  
39  
40  
41  
42  
43  
44  
45  
46  
47  
48  
49  
50  
51  
52  
53  
54  
55  
56  
57  
58  
59  
60



**Antenatal melatonin as an antioxidant in human pregnancies complicated by fetal growth restriction – a phase I pilot clinical trial: study protocol**

|                                 |                                                                                                                                                                                                                                                                                                                                                                                                                                                                                                                                                                                                                                                  |
|---------------------------------|--------------------------------------------------------------------------------------------------------------------------------------------------------------------------------------------------------------------------------------------------------------------------------------------------------------------------------------------------------------------------------------------------------------------------------------------------------------------------------------------------------------------------------------------------------------------------------------------------------------------------------------------------|
| Journal:                        | <i>BMJ Open</i>                                                                                                                                                                                                                                                                                                                                                                                                                                                                                                                                                                                                                                  |
| Manuscript ID:                  | bmjopen-2013-004141.R1                                                                                                                                                                                                                                                                                                                                                                                                                                                                                                                                                                                                                           |
| Article Type:                   | Protocol                                                                                                                                                                                                                                                                                                                                                                                                                                                                                                                                                                                                                                         |
| Date Submitted by the Author:   | 20-Nov-2013                                                                                                                                                                                                                                                                                                                                                                                                                                                                                                                                                                                                                                      |
| Complete List of Authors:       | <p>Alers, Nicole; Monash University, The Ritchie Centre, Monash Institute of Medical Research; Monash University, Department of Obstetrics and Gynaecology</p> <p>Jenkin, Graham; Monash University, The Ritchie Centre, Monash Institute of Medical Research; Monash University, Department of Obstetrics and Gynaecology</p> <p>Miller, Suzanne; Monash University, The Ritchie Centre, Monash Institute of Medical Research; Monash University, Department of Obstetrics and Gynaecology</p> <p>Wallace, Euan; Monash University, The Ritchie Centre, Monash Institute of Medical Research; Monash University, Obstetrics and Gynaecology</p> |
| <b>Primary Subject Heading</b>: | Obstetrics and gynaecology                                                                                                                                                                                                                                                                                                                                                                                                                                                                                                                                                                                                                       |
| Secondary Subject Heading:      | Obstetrics and gynaecology                                                                                                                                                                                                                                                                                                                                                                                                                                                                                                                                                                                                                       |
| Keywords:                       | Fetal medicine < OBSTETRICS, Maternal medicine < OBSTETRICS, OBSTETRICS                                                                                                                                                                                                                                                                                                                                                                                                                                                                                                                                                                          |
|                                 |                                                                                                                                                                                                                                                                                                                                                                                                                                                                                                                                                                                                                                                  |

SCHOLARONE™  
Manuscripts

1  
2  
3 **Title:** Antenatal melatonin as an antioxidant in human pregnancies complicated  
4  
5 by fetal growth restriction – a phase I pilot clinical trial: study protocol  
6  
7

8  
9  
10  
11 **Authors:** <sup>1,2</sup>Nicole O Alers, <sup>1,2</sup>Graham Jenkin, <sup>1,2</sup>Suzanne L Miller, <sup>1,2,3</sup>Euan M  
12  
13 Wallace  
14  
15

16  
17  
18 **Institutions:** <sup>1</sup>The Ritchie Centre, Monash Institute of Medical Research and  
19  
20 <sup>2</sup>Department of Obstetrics and Gynaecology, Monash University; <sup>3</sup>Monash  
21  
22 Women's Services, Monash Health, Clayton, Victoria, Australia.  
23  
24

25  
26  
27  
28 **Corresponding author:** Professor Euan M Wallace, Department of Obstetrics  
29  
30 and Gynaecology, Monash University, Monash Medical Centre, 246 Clayton Road,  
31  
32 Clayton, Victoria 3168, Australia. Tel: +613 9594 5145. Fax: +613 9594 5003.  
33  
34 E-mail: euan.wallace@monash.edu  
35  
36

37  
38  
39 **Keywords:** Fetal growth restriction, melatonin, clinical trial, oxidative stress,  
40  
41 antenatal neuroprotection.  
42  
43

44  
45  
46 **Word count:** 3143.  
47  
48  
49  
50  
51  
52  
53  
54  
55  
56  
57  
58  
59  
60

## ABSTRACT

**Background:** Fetal growth restriction complicates about 5% of pregnancies and is commonly caused by placental dysfunction. It is associated with increased risks of perinatal mortality and short- and long-term morbidity, such as cerebral palsy. Chronic *in utero* hypoxaemia, inflammation and oxidative stress are likely culprits contributing to the long-term neurological sequelae of fetal growth restriction. In this regard we propose that melatonin, a powerful antioxidant, might mitigate morbidity and/or mortality associated with fetal growth restriction. Melatonin has an excellent biosafety profile and crosses the placenta and blood brain barrier. We present the protocol for a phase I clinical trial to investigate the efficacy of maternal oral melatonin administration in women with a pregnancy complicated by fetal growth restriction.

**Methods and analysis:** The proposed trial is a single-arm open-label clinical trial involving 12 women. Severe, early onset fetal growth restriction will be diagnosed by estimated fetal weight  $\leq 10^{\text{th}}$  centile in combination with abnormal fetoplacental Doppler studies, occurring before 34 weeks of pregnancy. Baseline measurements of maternal and fetal wellbeing, levels of oxidative stress and ultrasound and Doppler measurements will be obtained at the time of diagnosis of fetal growth restriction. Women will then commence melatonin treatment (4mg) twice daily until birth. The primary outcomes are the levels of oxidative stress in the maternal and fetal circulation and placenta. Secondary outcomes are fetoplacental Doppler studies (uterine artery, middle cerebral artery, and ductus venosus), fetal biometry, fetal biophysical profile and a composite determination

1  
2  
3 of neonatal outcome. A historical cohort of gestational matched fetal growth  
4  
5 restriction and a healthy pregnancy cohort will be used as comparators.  
6  
7

8  
9  
10 **Ethics and dissemination:** Ethical approval has been obtained from Monash  
11  
12 Health Human Research Ethics Committee B (HREC12133B). Data will be  
13  
14 presented at international conferences and published in peer-reviewed journals.  
15  
16

17  
18  
19 **Trial registration number:** Clinical Trials, protocol registration system:  
20  
21 NCT01695070.  
22  
23  
24  
25  
26  
27  
28  
29  
30  
31  
32  
33  
34  
35  
36  
37  
38  
39  
40  
41  
42  
43  
44  
45  
46  
47  
48  
49  
50  
51  
52  
53  
54  
55  
56  
57  
58  
59  
60

## ARTICLE SUMMARY

### Article focus:

- This trial aims to establish the clinical and/or biochemical benefit of maternally administered melatonin as an antioxidant treatment in pregnancies affected by fetal growth restriction.
- Specific aims are:
  - To determine the effect of daily maternal oral melatonin on levels of oxidative stress in the placenta and in the maternal and fetal circulation in pregnancies affected by early onset fetal growth restriction.
  - To determine the effect of daily maternal oral melatonin on the clinical outcomes of pregnancies affected by early onset fetal growth restriction.
  - To determine the effect of daily maternal oral melatonin on brain injury and neurologic development in growth restricted newborn babies.

### Key messages:

- Fetal growth restriction is a serious pregnancy complication and is associated with significant fetal and neonatal morbidity and mortality. Fetal brain injury is common in fetal growth restriction.

- Brain injury in survivors of fetal growth restriction is likely to originate antenatally as a consequence of oxidative stress.
- There are currently no established treatments for fetal growth restriction or for neuroprotection in fetal growth restriction.
- Numerous animal studies have established the use of melatonin as an antenatal antioxidant and neuroprotectant in acute and chronic hypoxia. In this study we aim to explore whether melatonin is an effective antioxidant in the treatment of human fetal growth restriction.

Strengths and limitations of this study:

- This pilot study has an appropriate design, and includes sufficient participants, to achieve measureable outcomes. Extensive previous human and animal studies form the basis for the design of this trial.
- This pilot study is the first of its kind in the world. Being a pilot study, this trial lacks randomisation and a placebo group, although comparator groups are included. If this trial is successful, results will be used to inform future randomized controlled trials.



## INTRODUCTION

Fetal growth restriction (FGR) defines the fetus that does not realise its normal growth potential. This significant pregnancy complication accounts for about 5 percent of all pregnancies(1). FGR is most commonly caused by placental dysfunction(2). FGR is strongly associated with increased risks of preterm birth, perinatal death, and, among survivors, significant cardiovascular and neurological morbidities, including cerebral palsy(3-7).

State-of-the-art fetal surveillance techniques are important in the diagnosis and surveillance of the growth restricted fetus, and afford timely delivery. However, with the exception of antenatal glucocorticoids there are currently no treatments to reduce the short- and long-term morbidities associated with FGR(8). In FGR, injury to the developing fetal brain is likely to principally occur *in utero*, emphasizing that, if the burden of neurological morbidity is to be reduced, then antenatal neuroprotective treatment, as opposed to postnatal therapy, will be necessary. Thus, future treatment should be directed at protecting fetal brain development and reducing the incidence of brain injury before birth rather than solely focusing on care in the nursery.

Although many *in utero* events can perturb normal fetal brain development, it is thought that chronic fetoplacental hypoxaemia and oxidative stress are the likely key mechanisms initiating pathways leading to brain injury(9). In placental dysfunction, the placenta is exposed to recurrent ischaemia-reperfusion injury, ultimately leading to decreased placental oxygen transfer capacity.

1  
2  
3 Consequently, the placenta cannot adequately meet the growing metabolic needs  
4  
5 of the fetus, which in turn becomes progressively hypoxaemic. Compensatory  
6  
7 fetal mechanisms attempt to maintain adequate oxygenation, particularly of the  
8  
9 heart and brain. Nevertheless, these eventually fail and a complex cascade of  
10  
11 metabolic events is initiated that involves the generation of nitrogen and oxygen  
12  
13 free radicals(10).  
14  
15

16  
17 The central nervous system, and in particular the fetal brain, is particularly  
18  
19 susceptible to free radical damage(11). Low antioxidant defenses and abundant  
20  
21 iron within the fetal brain render it vulnerable to oxidative stress. Further, the  
22  
23 fetal brain is rich in membrane lipids that are sensitive to free radical attack.  
24  
25

26  
27 Indeed, lipid peroxidation plays an important role in neuronal and white matter  
28  
29 damage directly and indirectly. Byproducts of lipid peroxidation can trigger  
30  
31 vasoconstriction(12), and are cytotoxic, mutagenic and teratogenic(13–15).  
32  
33

34  
35 Magnetic resonance imaging of preterm infants with white matter injury show  
36  
37 significantly higher levels of protein and lipid peroxidation(16). Furthermore, in  
38  
39 an autopsy study on human brain tissue, activated microglia, significant protein  
40  
41 nitration, lipid peroxidation and cell injury were all detected in premyelinating  
42  
43 oligodendrocytes in babies diagnosed with periventricular leukomalacia(17).  
44  
45

46  
47 Melatonin (5-methoxy-N-acetyltryptamine) is an endogenous lipid-soluble  
48  
49 hormone, predominantly produced in the pineal gland that is best recognized for  
50  
51 its role in providing circadian and seasonal timing cues. It is also a strong  
52  
53 antioxidant. It effectively scavenges free radicals, induces endogenous  
54  
55 antioxidant enzymes, such as glutathione peroxidase and glutathione  
56  
57 reductase(18), and inhibits the pro-oxidative enzyme nitric oxide synthase(19).  
58  
59  
60

1  
2  
3 Melatonin also stabilizes cell membranes, enhancing their resistance to oxidative  
4 damage(20). *In vitro*, melatonin treatment protects the villous trophoblast  
5  
6 against hypoxia-reperfusion induced oxidative stress and apoptosis(21). Due to  
7  
8 its strong antioxidant capacity and its ability to cross the human placenta(22)  
9  
10 and blood-brain barrier(23), melatonin is of particular interest as a candidate  
11  
12 antenatal neuroprotectant. The neuroprotective potential of melatonin is  
13  
14 augmented by the fact that melatonin inhibits norepinephrine-induced middle  
15  
16 cerebral artery constriction(24) and induces umbilical vasodilation(25) in ovine  
17  
18 models of fetal growth restriction. In animal models, we have shown that  
19  
20 melatonin treatment before and during transient severe fetal asphyxia  
21  
22 prevented the formation of hydroxyl radicals within the fetal brain(26), reduced  
23  
24 lipid peroxidation and cell death and stabilized the blood-brain-barrier(27).  
25  
26 Administration of melatonin at the time of induced hypoxia in the fetal sheep  
27  
28 brain also reduced inflammation and cell death(28). Using an established ovine  
29  
30 model of fetal growth restriction(29), we have now shown that maternal  
31  
32 administration of melatonin reduced fetal hypoxia, improved  
33  
34 neurodevelopment and decreased brain injury and oxidative stress in newborn  
35  
36 lambs(*SL Miller, unpublished data 2013*).

37  
38  
39 Melatonin treatment during human pregnancy has been studied for a large range  
40  
41 of conditions and at different times during gestation. Predominantly, melatonin  
42  
43 has been studied in assisted reproductive technology, aiming to improve oocyte  
44  
45 quality and pregnancy rates following *in vitro* fertilization (IVF). Melatonin  
46  
47 administration, commenced prior to IVF-cycles and continued during pregnancy,  
48  
49 was associated with modestly improved pregnancy outcomes(30–32).  
50  
51  
52  
53  
54  
55  
56  
57  
58  
59  
60

1  
2  
3 Importantly, all babies that were born from melatonin-treated pregnancies were  
4  
5 born healthy and with no congenital abnormalities (*V. Unfer. personal*  
6  
7 *communication, 2012*). Furthermore, maternal treatment with melatonin  
8  
9 significantly boosts placental antioxidant enzyme gene expression(22).  
10

11  
12 Except for its known, benign effects on sleep dynamics, melatonin does not exert  
13  
14 acute pharmacological effects on the nervous or vascular system. A median lethal  
15  
16 dose in mice could not be calculated because an increased mortality rate was not  
17  
18 observed, even following extremely high doses of up to 800mg/kg  
19  
20 melatonin(33). Long term nightly oral treatment with 75mg melatonin in 1400  
21  
22 non-pregnant women did not cause any serious adverse effects(34). To our  
23  
24 knowledge, no maternal and/or developmental toxicity effects, due to melatonin  
25  
26 treatment, have been reported. The maternal no adverse effect level (NOAEL)  
27  
28 and lowest observed adverse effect level (LOAEL) were established at 100 and  
29  
30 200mg/kg/day, respectively, for maternally administered melatonin in pregnant  
31  
32 rats. The developmental toxicity NOAEL was  $\geq 200\text{mg/kg/day}$ (35).  
33  
34  
35  
36  
37  
38

39 **Rationale:** Fetal growth restriction is a serious pregnancy complication,  
40  
41 affecting up to 5% of pregnancies. It is associated with significant fetal and  
42  
43 neonatal mortality and morbidity, including neurological impairment. Even  
44  
45 though modern obstetrics allows for careful fetal monitoring, there are neither  
46  
47 effective therapies for fetal growth restriction nor established options for  
48  
49 antenatal neuroprotection in fetal growth restriction. Numerous animal studies  
50  
51 have established the use of melatonin as an effective antenatal antioxidant and  
52  
53 neuroprotectant in acute and chronic hypoxia. In this trial we aim to explore, for  
54  
55  
56  
57  
58  
59  
60

1  
2  
3 the first time, whether melatonin is an effective antioxidant in human fetal  
4  
5 growth restriction.  
6  
7

8 **Aims:** We will establish the clinical and/or biochemical benefit of maternally  
9 administered melatonin as an antioxidant treatment in pregnancies affected by  
10 fetal growth restriction.  
11  
12  
13

14  
15  
16 Specific aims are:  
17

- 18  
19  
20 1. To determine the effect of daily maternal oral melatonin on markers of  
21 oxidative stress in the placenta, and maternal and fetal circulations in  
22 pregnancies affected by early onset fetal growth restriction.  
23  
24 2. To determine the effect of daily maternal oral melatonin on the clinical  
25 outcomes of pregnancies affected by early onset fetal growth restriction.  
26  
27 3. To determine the effect of daily maternal oral melatonin on brain injury and  
28 neurodevelopment in growth restricted newborn babies.  
29  
30  
31  
32  
33  
34  
35  
36  
37  
38  
39

## 40 **METHODS AND ANALYSIS**

41  
42  
43 **Study design:** Phase I single-arm open label clinical trial, with historic cohorts of  
44 FGR and healthy pregnancies as comparators.  
45  
46  
47  
48

49  
50 **Subjects:** Twelve women (pregnancies) with fetal growth restriction will be  
51 recruited and studied to completion of the trial. A historical cohort of gestational  
52 matched fetal growth restriction and a healthy pregnancy cohort will be used as  
53 comparators.  
54  
55  
56  
57  
58  
59  
60

1  
2  
3  
4  
5  
6  
7  
8 **Patient eligibility:** Pregnant women with a singleton growth restricted fetus  
9  
10 between 23<sup>+0</sup> and 34<sup>+0</sup> weeks (confirmed gestational age). Fetal growth  
11  
12 restriction will be defined as a sonographic estimated fetal weight at or below  
13  
14 the 10<sup>th</sup> centile for gestational age in combination with at least one abnormal  
15  
16 fetoplacental Doppler study of the uterine artery (bilateral uterine artery  
17  
18 notching or unilateral uterine artery notching on the ipsilateral side of the  
19  
20 placenta), umbilical artery (systolic:diastolic ratio  $\geq 95^{\text{th}}$  centile or absent, or,  
21  
22 reversed end-diastolic flow), middle cerebral artery (pulsatility index  $\leq 5^{\text{th}}$   
23  
24 centile) or ductus venosus (abnormal A wave and/or pulsatility index  $\geq 95^{\text{th}}$   
25  
26 centile). For consenting purposes, mothers must be 18 years or older and have a  
27  
28 basic understanding of English. Women with an unconfirmed pregnancy  
29  
30 duration, a multiple pregnancy, or a pregnancy affected by maternal or fetal  
31  
32 infection, or with a fetus with a chromosomal or major structural anomaly or  
33  
34 non-placental fetal growth restriction will be excluded from this trial.  
35  
36  
37  
38  
39  
40  
41  
42  
43  
44

45 **Recruitment:** Patients will be recruited from the maternity services of Monash  
46  
47 Health and Jessie McPherson Private Hospital, Melbourne, Australia. The study  
48  
49 will be staffed with a clinical research team, who will inform potential  
50  
51 participants about the aims, methods and potential risks and benefits of this  
52  
53 study. Subjects will be informed that their participation is voluntary and that  
54  
55 they may withdraw consent to participate at any time during the study, and for  
56  
57  
58  
59  
60

1  
2  
3 any reason, and that choosing not to participate or withdraw will not affect their  
4  
5 care. An information form about the trial and opportunities to ask questions will  
6  
7 be offered to the woman and any other person(s) she chooses. Women will be  
8  
9 recruited to the study following written informed consent.  
10  
11

12  
13  
14 **Trial treatment:** Following recruitment, and until delivery, women will receive  
15  
16 oral melatonin prolonged release (Circadin®, Neurim Pharmaceuticals), 4mg  
17  
18 twice daily (a total daily dose of 8mg) approximately 12 hours apart. This dose  
19  
20 and regimen are based on results from our own experimental animal research,  
21  
22 previously published animal research, and clinical trials.  
23  
24

25  
26  
27  
28 In our experimental FGR-study a maternal, cumulative, intravenous dose of  
29  
30 6.0mg/day was administered. The human equivalent dose (HED) was calculated  
31  
32 using the FDA-dose-conversion algorithm(36) and the average Australian height  
33  
34 and weight. This resulted in a dose between 7.3mg/day (based on pre-pregnancy  
35  
36 weight) and 8.1mg/day (based on end-pregnancy weight). As Circadin® is only  
37  
38 available in 2mg tablets, the chosen dose for this study is 8mg per day.  
39  
40  
41

42  
43  
44 This dose of melatonin is lower than the used doses in several clinical studies in  
45  
46 neonates. These trials evaluated melatonin as an antioxidant treatment in  
47  
48 newborns with birth asphyxia and other conditions associated with increased  
49  
50 oxidative stress. Melatonin was administered orally in doses up to 80mg/day in  
51  
52 these trials without any toxicity(37–41). In clinical trials using melatonin to  
53  
54 improve assisted reproductive technology, melatonin was administered orally in  
55  
56 doses of 3mg/day before and during pregnancy(30,32,42). Melatonin treatment,  
57  
58  
59  
60

1  
2  
3 started prior to conception and continued until birth, did not adversely affect  
4 pregnancy outcome and fetal or neonatal health (*V. Unfer. personal*  
5 *communication, 2012*). The dose in this trial is higher than previously used doses  
6  
7 in human pregnancy but still falls well below the maternal and fetal NOAEL (HED  
8 16 and 32mg/kg respectively) and maternal LOAEL (HED 32mg/kg).  
9  
10  
11  
12  
13

14  
15  
16 Melatonin will be administered orally as 4mg given twice per day. This dosage  
17 regimen is chosen because the terminal half-life of Circadin® is 3.5 to 4 hours. In  
18 fetal growth restriction, increased levels of oxidative stress likely occur due to  
19 continuous placental generation of reactive oxygen species. By administering  
20 melatonin twice daily, we aim to provide a sustained increase in maternal and  
21 fetal serum. To minimize daytime sleepiness and severe disturbances of  
22 circadian rhythms, melatonin will be given early in the morning and at night.  
23  
24  
25  
26  
27  
28  
29  
30  
31  
32  
33

34  
35 **Sample collection:** Prior to starting melatonin, a maternal blood sample will be  
36 taken and ultrasound and Doppler measurements will be obtained. This will be  
37 repeated once per week until birth. Immediately prior to birth, a maternal blood  
38 sample will be obtained. At the time of birth, samples of the amniotic fluid,  
39 umbilical cord blood and placenta will be collected. Clinical details of pregnancy,  
40 including medication and (multi) vitamin use, delivery and neonatal outcomes  
41 will be recorded in pre-specified case record forms.  
42  
43  
44  
45  
46  
47  
48  
49  
50

51  
52  
53 All blood samples will be collected in serum tubes and blood RNA tubes, allowing  
54 for measurement of markers of oxidative stress and gene expression studies  
55 respectively. Serum tubes will be centrifuged (4400g, 15 minutes). The serum  
56  
57  
58  
59  
60



1  
2  
3 will be collected and transferred into collection tubes. The collection tubes will  
4  
5 be stored in a -80°C until further processing.  
6  
7

8  
9  
10 Amniotic fluid will be collected during caesarean section deliveries. The  
11  
12 myometrium will be bisected sharply and distinctly from the amnion and  
13  
14 chorion. The amniotic fluid will be aspirated using a sterile syringe and 18 gauge  
15  
16 drawing-up needle. Samples visibly contaminated with blood will be discarded  
17  
18 off. Within 30 minutes of the sample collection, specimens will be transferred to  
19  
20 a laboratory. The samples will be centrifuged (1000g, 15 minutes) and the  
21  
22 supernatant will be collected, transferred into sterile collection tubes and snap  
23  
24 frozen. Specimens will be stored at -80°C until further analysis.  
25  
26  
27

28  
29  
30 Placentas will be obtained at time of delivery and placed in a sterile tray. The  
31  
32 area at the midpoint of the longest distance between the cord insertion and the  
33  
34 edge of the placental disc will be sampled. Six full thickness placental samples  
35  
36 will be cut out using sterile scissors. The placental tissue samples will be  
37  
38 removed from the membranes using sterile forceps and scissors. The placental  
39  
40 tissue samples will then be washed in a sterile container using ice cold, sterile  
41  
42 phosphate-buffered saline. Two tissue samples will be fixed in 4%  
43  
44 paraformaldehyde and embedded in paraffin for histological analysis. Two tissue  
45  
46 samples will be placed in sterile tubes containing RNA-later for 24 hours at 4°C.  
47  
48 After immersion in RNA-later, these two samples will be transferred into two  
49  
50 sterile cryovials, snap frozen in liquid nitrogen and stored at -80°C until further  
51  
52 processing for gene expression studies. The remaining tissue samples will be  
53  
54 placed into sterile cryovials and snap frozen in liquid nitrogen. Samples will be  
55  
56  
57  
58  
59  
60

1  
2  
3 stored in a -80°C freezer until further processing to measure levels of oxidative  
4 stress and melatonin.  
5  
6  
7  
8  
9  
10

11  
12 **Outcome measures:** The primary outcome will be the level of oxidative stress  
13 in the placenta and in the maternal (before and during treatment and at  
14 delivery) and fetal (umbilical artery and vein at delivery) circulations, as  
15 reflected by the measurement of malondialdehyde, 8-isoprostane, total  
16 antioxidant capacity and superoxide dismutase. Levels of melatonin will be  
17 measured in maternal and fetal blood and in the placenta. Gene expression of  
18 pro- and antioxidant enzymes, melatonin synthesizing enzymes, melatonin  
19 receptors and clock genes will be measured in the placenta and in the maternal  
20 and fetal blood.  
21  
22  
23  
24  
25  
26  
27  
28  
29  
30  
31  
32  
33  
34

35 The secondary outcome measures will include clinical parameters about the  
36 pregnancy and its duration, fetal and neonatal wellbeing, mortality and  
37 morbidity (Tables 1-4).  
38  
39  
40  
41  
42  
43  
44  
45  
46  
47  
48  
49  
50  
51  
52  
53  
54  
55  
56  
57  
58  
59  
60

**Table 1: Ultrasound and Doppler measurements.**

---

**Doppler and ultrasound measurements:** at recruitment and then weekly until delivery.

---

Doppler velocimetry: umbilical artery, middle cerebral artery, ductus venosus, and maternal uterine arteries

Biometry (fortnightly)

Amniotic fluid index

Fetal behaviour: heart rate, tone, breathing, gross body movements

---

**Table 2: Maternal morbidity.**

---

**Markers of maternal morbidity:** at recruitment and at least weekly until delivery.

---

Blood pressure

Complete blood count

Liver function tests (AST, ALT, GTT, bilirubin)

Renal function tests (urea, creatinine, uric acid)

---

**Table 3: Pregnancy end-points****Pregnancy outcomes:**

Gestational age at birth

Diagnosis to delivery interval

Abnormal cardiotocogram

Indication for delivery (if not spontaneous)

Mode of birth

Labour analgesia/anaesthesia

Duration of labour stages

Duration of membrane rupture to birth

Used medication such as antihypertensives, magnesium sulphate and corticosteroids.

Use of (multi) vitamins and dietary supplements

**Table 4: Neonatal outcomes.****Neonatal outcomes:**

Sex

Apgar scores (1, 5, 10 minutes)

Birth weight

Cord artery S100B

Head circumference at birth

Composite neonatal outcome: admission to neonatal intensive care unit, duration of admission, need for and duration of respiratory support,

1  
2  
3 intraventricular haemorrhage, necrotizing enterocolitis, abnormal neurology,  
4  
5 mortality prior to discharge  
6  
7

---

8  
9  
10  
11 **Follow up of women and infants:** Participants will be followed weekly for the  
12 duration of the trial. The routine clinical care of participants, including  
13 ultrasound scans, will not be affected by participation in the study. During the  
14 weekly follow-up, fetal and maternal wellbeing will be assessed and women will  
15 discuss any issues that they have experienced. Medication will be supplied  
16 weekly to meet the requirements for the following week. Women will be asked to  
17 keep a medication and symptom diary (drowsiness, sleepiness, general physical  
18 well-being, time of melatonin intake), which will be reviewed weekly by the  
19 principal investigator. Melatonin treatment will cease as soon as birth has  
20 occurred. Postnatal clinical care of the women will be the responsibility of the  
21 attending obstetric team. The principal investigator will assess the clinical  
22 condition of participants daily during the first three days post-partum, to ensure  
23 that no problems become apparent in response to withdrawal from treatment.  
24 Clinical data will be obtained from neonates who require admission to the  
25 neonatal intensive care unit. Long-term follow-up using neurodevelopmental  
26 examination and questionnaires and MRI scans, are desirable but will depend on  
27 funding.  
28  
29  
30  
31  
32  
33  
34  
35  
36  
37  
38  
39  
40  
41  
42  
43  
44  
45  
46  
47  
48  
49  
50

51  
52  
53 **Sample size and statistical analysis of data:** This study is a proof-of-principle  
54 phase I trial. As such, there are no current data available to undertake a formal  
55 power calculation to determine the sample size. If successful, this exploratory  
56  
57  
58  
59  
60

1  
2  
3 study will provide the measures needed to perform the power calculations  
4  
5 required for the planned phase II randomized-controlled trial. This trial will  
6  
7 provide data for the establishment of the use of maternal melatonin treatment in  
8  
9 fetal growth restriction.

10  
11 The results obtained in this trial will be compared to historic cohorts of  
12  
13 untreated fetal growth restriction and healthy pregnancies, which we have been  
14  
15 collecting since 2011, using the same protocol.

16  
17 Biomarkers of oxidative stress in the maternal blood samples will be analysed  
18  
19 using a repeated measures analysis of variance, including the baseline value as a  
20  
21 covariate. It is assumed that the effect of treatment with melatonin on levels of  
22  
23 oxidative stress will not depend on duration of treatment. However, secondary  
24  
25 analysis will be performed to determine the effect of treatment duration on  
26  
27 biomarkers of oxidative stress. If the treatment duration significantly impacts on  
28  
29 the effect of melatonin on the oxidative stress status, this will be further  
30  
31 investigated using the least-square measure. Data will be plotted as mean scores  
32  
33 over time.  
34  
35  
36  
37  
38  
39  
40

41 Biomarkers of oxidative stress in the maternal blood samples will be analysed  
42  
43 using a repeated measures analysis of variance, including the baseline value as a  
44  
45 covariate. Levels of oxidative stress in the maternal blood sample obtained  
46  
47 immediately prior to birth will be compared to samples derived from the historic  
48  
49 cohorts using a one-way ANOVA. Levels of oxidative stress and brain injury will  
50  
51 be compared to data obtained from the previously described historic cohorts.  
52  
53 Clinical data regarding maternal wellbeing, pregnancy outcome and neonatal  
54  
55  
56  
57  
58  
59  
60

1  
2  
3 outcome will be compared to the same cohorts. These data will be analysed using  
4  
5 a one-way ANOVA.  
6  
7

8  
9 A p-value  $\leq 0.05$  is considered to be statistically significant.  
10  
11

12  
13  
14 **Adverse events and safety monitoring:** During the treatment period, clinical  
15 care will remain unchanged and will be the responsibility of uninvolved medical  
16 staff. The principal investigator will monitor all participants weekly, take a brief  
17 medical history, measure blood pressure and interpret ultrasound scan results  
18 (obtained by uninvolved staff) to ensure melatonin treatment can be safely  
19 continued. A weekly blood sample will be obtained to perform a full blood  
20 examination, assess liver and renal function and assess C-reactive protein. For  
21 the duration of the trial, the principal investigator will be contactable by  
22 telephone at all times.  
23  
24

25 Any adverse medical events reported by the patient will be recorded in the  
26 patients' medical records at each visit. Serious adverse events occurring after  
27 initiation of the trial will be reported to the Monash Health Human Research  
28 Ethics committee, Therapeutics Committee and Therapeutic Goods  
29 Administration of Australia's Office of Scientific Evaluation within 72 hours.  
30  
31  
32  
33  
34

#### 35 36 37 38 39 40 41 42 43 44 45 46 47 48 **Trial discontinuation or modification**

49 The participants can end participation at their own request at any time.  
50  
51 Participants will be withdrawn from the trial if they or their fetus suffer from an  
52 unexpected serious adverse event. Worsening of fetoplacental Doppler  
53  
54  
55  
56  
57  
58  
59  
60

1  
2  
3 velocimetry or fetal growth are within the natural history of fetal growth  
4  
5 restriction and are not part of the discontinuation criteria.  
6  
7  
8

9  
10 **Ethics and dissemination:** This study has been approved by the Monash Health  
11  
12 Human Research Ethics Committee B (HREC 12133B). Data will be presented at  
13  
14 relevant conferences and published in peer-reviewed journals.  
15  
16

## 17 18 19 **DISCUSSION**

20  
21  
22  
23  
24 The use of melatonin as an antenatal antioxidant therapy in fetal growth  
25  
26 restriction has been proposed as a promising and safe option to protect the fetal  
27  
28 brain from injury. This trial is essential to confirm the antioxidant capacity and  
29  
30 safety of melatonin treatment. If this study confirms that maternal melatonin can  
31  
32 decrease maternal, fetal and/or placental levels of oxidative stress, we will  
33  
34 proceed to a phase II randomized-controlled trial to assess the effect of maternal  
35  
36 melatonin treatment on brain injury and neurodevelopment. In addition,  
37  
38 melatonin treatment could also potentially be used as an antenatal  
39  
40 neuroprotectant in other compromised pregnancies or in threatened preterm  
41  
42 birth to protect the mother and/or fetus. Finally, if melatonin treatment indeed  
43  
44 strengthens antioxidant defenses during pregnancy, it might be a suitable new  
45  
46 strategy in the management of pre-eclampsia. A phase I study to study the  
47  
48 clinical and biochemical benefit of melatonin treatment in preeclampsia has been  
49  
50 initiated.  
51  
52  
53  
54  
55  
56  
57  
58  
59  
60



**AUTHORS' CONTRIBUTIONS**

NOA: research, contribution of original material, editing and approval of final manuscript. SLM, GJ, EMW: editing and approval of final manuscript.

**FUNDING STATEMENT**

This work was supported by the 5Point Foundation.

**COMPETING INTERESTS**

NOA is funded by a Monash Graduate Scholarship and a Monash International Postgraduate Research Scholarship.

## REFERENCES

1. Robert R. Intrauterine growth restriction. *Obstet Gynecol.* 2002 Mar;99(3):490--496.
2. Warkany J, Monroe BB, Sutherland BS. Intrauterine Growth Retardation. *Am J Dis Child.* 1961 Aug;102(2):249-79.
3. Chase HC. A study of infant mortality from linked records: comparison of neonatal mortality from two cohort studies. United States, January-March 1950 and 1960. *Vital Health Stat 20 Data Natl Vital Stat Syst.* 1972 Jun;13:1--99.
4. Ghidini A. Doppler of the Ductus Venosus in Severe Preterm Fetal Growth Restriction. *Obstet Gynecol.* 2007 Feb;109(2, Part 1):250-2.
5. Bernstein IM, Horbar JD, Badger GJ, et al. Morbidity and mortality among very-low-birth-weight neonates with intrauterine growth restriction. The Vermont Oxford Network. *Am J Obstet Gynecol.* 2000 Jan;182(1 Pt 1):198--206.
6. Ross MG, Beall MH. Adult Sequelae of Intrauterine Growth Restriction. *Semin Perinatol.* 2008 Jun;32(3):213-8.
7. Barker DJ. In utero programming of chronic disease. *Clin Sci Lond Engl* 1979. 1998 Aug;95(2):115-28.
8. Miller SL, Wallace EM. Effect of Antenatal Steroids on Haemodynamics in the Normally Grown and Growth Restricted Fetus. *Curr Pediatr Rev.* 2013 Feb 1;9(1):67-74.
9. Miller SL, Wallace EM, Walker DW. Antioxidant Therapies: A Potential Role in Perinatal Medicine. *Neuroendocrinology [Internet].* 2012.
10. Love S. Oxidative stress in brain ischemia. *Brain Pathol Zurich Switz.* 1999 Jan;9(1):119-31.
11. Halliwell B. Reactive oxygen species and the central nervous system. *J Neurochem.* 1992 Nov;59(5):1609-23.
12. Morrow JD, Minton TA, Roberts II LJ. The F2-isoprostane, 8-epi-prostaglandin F2  $\alpha$  , a potent agonist of the vascular thromboxane/endoperoxide receptor, is a platelet thromboxane/endoperoxide receptor antagonist. *Prostaglandins.* 1992 Aug;44(2):155-63.

13. Schmidt H, Grune T, Müller R, et al. Increased levels of lipid peroxidation products malondialdehyde and 4-hydroxynonenal after perinatal hypoxia. *Pediatr Res*. 1996 Jul;40(1):15–20.
14. Wentzel P, Eriksson UJ. 8-Iso-PGF2  $\alpha$  administration generates dysmorphogenesis and increased lipid peroxidation in rat embryos in vitro. *Teratology*. 2002;66(4):164–8.
15. Marnett LJ. Lipid peroxidation—DNA damage by malondialdehyde. *Mutat Res Mol Mech Mutagen*. 1999 Mar;424(1–2):83–95.
16. Inder T, Mocatta T, Darlow B, et al. Elevated free radical products in the cerebrospinal fluid of VLBW infants with cerebral white matter injury. *Pediatr Res*. 2002 Aug;52(2):213–8.
17. Haynes RL, Folkerth RD, Keefe RJ, et al. Nitrosative and oxidative injury to premyelinating oligodendrocytes in periventricular leukomalacia. *J Neuropathol Exp Neurol*. 2003 May;62(5):441–50.
18. Pablos MI, Chuang J, Reiter RJ, et al. Time course of the melatonin-induced increase in glutathione peroxidase activity in chick tissues. *Biol Signals*. 1995;4(6):325–30.
19. Pozo D, Reiter RJ, Calvo JR, et al. Inhibition of cerebellar nitric oxide synthase and cyclic GMP production by melatonin via complex formation with calmodulin. *J Cell Biochem*. 1997 Jun;65(3):430–42.
20. García JJ, Reiter RJ, Guerrero JM, et al. Melatonin prevents changes in microsomal membrane fluidity during induced lipid peroxidation. *FEBS Lett*. 1997 May;408(3):297–300.
21. Lanoix D, Lacasse A-A, Reiter RJ, et al. Melatonin: The watchdog of villous trophoblast homeostasis against hypoxia/reoxygenation-induced oxidative stress and apoptosis. *Mol Cell Endocrinol*. 2013 Dec 5;381(1–2):35–45.
22. Okatani Y, Okamoto K, Hayashi K, et al. Maternal - fetal transfer of melatonin in pregnant women near term. *J Pineal Res*. 1998 Nov;25(3):129–34.
23. Okatani Y, Wakatsuki A, Kaneda C. Melatonin increases activities of glutathione peroxidase and superoxide dismutase in fetal rat brain. *J Pineal Res*. 2000 Mar;28(2):89–96.
24. Torres-Farfan C, Valenzuela FJ, Mondaca M, et al. Evidence of a role for melatonin in fetal sheep physiology: direct actions of melatonin on fetal cerebral artery, brown adipose tissue and adrenal gland. *J Physiol*. 2008 Aug;586(16):4017–27.

- 1
- 2
- 3 25. Thakor AS, Herrera EA, Serón - Ferré M, et al. Melatonin and vitamin C
- 4 increase umbilical blood flow via nitric oxide - dependent mechanisms. *J*
- 5 *Pineal Res.* 2010 Nov;49(4):399-406.
- 6
- 7 26. Miller SL, Yan EB, Castillo-Melendez M, et al. Melatonin Provides
- 8 Neuroprotection in the Late-Gestation Fetal Sheep Brain in Response to
- 9 Umbilical Cord Occlusion. *Dev Neurosci.* 2005;27(2-4):200-10.
- 10
- 11 27. Yawno T, Castillo-Melendez M, Jenkin G, et al. Mechanisms of melatonin-
- 12 induced protection in the brain of late gestation fetal sheep in response to
- 13 hypoxia. *Dev Neurosci.* 2012;34(6):543-51.
- 14
- 15 28. Welin A-K, Svedin P, Lapatto R, et al. Melatonin Reduces Inflammation and
- 16 Cell Death in White Matter in the Mid-Gestation Fetal Sheep Following
- 17 Umbilical Cord Occlusion. *Pediatr Res.* 2007 Feb;61(2):153-8.
- 18
- 19 29. Supramaniam VG, Jenkin G, Loose J, et al. Chronic fetal hypoxia increases
- 20 activin A concentrations in the late-pregnant sheep. *BJOG Int J Obstet*
- 21 *Gynaecol.* 2006 Jan;113(1):102-9.
- 22
- 23 30. Unfer V, Raffone E, Rizzo P, et al. Effect of a supplementation with myo-
- 24 inositol plus melatonin on oocyte quality in women who failed to conceive
- 25 in previous in vitro fertilization cycles for poor oocyte quality: a
- 26 prospective, longitudinal, cohort study. *Gynecol Endocrinol.* 2011
- 27 Nov;27(11):857-61.
- 28
- 29 31. Tamura H, Nakamura Y, Terron MP, et al. Melatonin and pregnancy in the
- 30 human. *Reprod Toxicol.* 2008 Apr;25(3):291-303.
- 31
- 32 32. Benedetto PPRERV. Effect of the treatment with myo-inositol plus folic acid
- 33 plus melatonin in comparison with a treatment with myo-inositol plus folic
- 34 acid on oocyte quality and pregnancy outcome in IVF cycles. A prospective,
- 35 clinical trial. *Eur Rev Med Pharmacol Sci.* 2010 Jun;14(6):555.
- 36
- 37 33. Barchas J, Dacosta F, Spector S. Acute Pharmacology of Melatonin. *Nature.*
- 38 1967 May;214(5091):919-920.
- 39
- 40 34. Silman RE. Melatonin: a contraceptive for the nineties. *Eur J Obstet Gynecol*
- 41 *Reprod Biol.* 1993 Apr;49(1-2):3-9.
- 42
- 43 35. Jahnke G, Marr M, Myers C, et al. Maternal and developmental toxicity
- 44 evaluation of melatonin administered orally to pregnant Sprague-Dawley
- 45 rats. *Toxicol Sci Off J Soc Toxicol.* 1999 Aug;50(2):271-9.
- 46
- 47 36. FDA USF and DA. Guidance for Industry: Estimating the Maximum Safe
- 48 Starting Dose in Initial Clinical Trials for Therapeutics in Adult Healthy
- 49 Volunteers. 2005.
- 50
- 51 37. Gitto E, Reiter RJ, Cordaro SP, et al. Oxidative and inflammatory parameters
- 52 in respiratory distress syndrome of preterm newborns: beneficial effects of
- 53 melatonin. *Am J Perinatol.* 2004 May;21(4):209-16.
- 54
- 55
- 56
- 57
- 58
- 59
- 60

- 1
- 2
- 3 38. Gitto E, Romeo C, Reiter RJ, et al. Melatonin reduces oxidative stress in
- 4 surgical neonates. *J Pediatr Surg*. 2004 Feb;39(2):184–189; discussion 184–
- 5 189.
- 6
- 7 39. Gitto E, Karbownik M, Reiter RJ, et al. Effects of melatonin treatment in
- 8 septic newborns. *Pediatr Res*. 2001;50(6):756.
- 9
- 10 40. Fulia F, Gitto E, Cuzzocrea S, et al. Increased levels of malondialdehyde and
- 11 nitrite/nitrate in the blood of asphyxiated newborns: reduction by
- 12 melatonin. *J Pineal Res*. 2001 Nov;31(4):343–9.
- 13
- 14 41. Gitto E, Aversa S, Salpietro CD, et al. Pain in neonatal intensive care: role of
- 15 melatonin as an analgesic antioxidant. *J Pineal Res* [Internet]. [cited 2012
- 16 Feb 13].
- 17
- 18 42. Tamura H, Takasaki A, Miwa I, et al. Oxidative stress impairs oocyte quality
- 19 and melatonin protects oocytes from free radical damage and improves
- 20 fertilization rate. *J Pineal Res*. 2008 Apr;44(3):280–7.
- 21
- 22
- 23
- 24
- 25
- 26
- 27
- 28
- 29
- 30
- 31
- 32
- 33
- 34
- 35
- 36
- 37
- 38
- 39
- 40
- 41
- 42
- 43
- 44
- 45
- 46
- 47
- 48
- 49
- 50
- 51
- 52
- 53
- 54
- 55
- 56
- 57
- 58
- 59
- 60

1  
2  
3 **Title:** Antenatal melatonin as an antioxidant in human pregnancies complicated  
4  
5 by fetal growth restriction – a phase I pilot clinical trial: study protocol  
6  
7

8  
9  
10  
11 **Authors:** <sup>1,2</sup>Nicole O Alers, <sup>1,2</sup>Graham Jenkin, <sup>1,2</sup>Suzanne L Miller, <sup>1,2,3</sup>Euan M  
12  
13 Wallace  
14  
15

16  
17  
18 **Institutions:** <sup>1</sup>The Ritchie Centre, Monash Institute of Medical Research and  
19  
20 <sup>2</sup>Department of Obstetrics and Gynaecology, Monash University; <sup>3</sup>Monash  
21  
22 Women's Services, Monash Health, Clayton, Victoria, Australia.  
23  
24

25  
26  
27 **Corresponding author:** Professor Euan M Wallace, Department of Obstetrics  
28  
29 and Gynaecology, Monash University, Monash Medical Centre, 246 Clayton Road,  
30  
31 Clayton, Victoria 3168, Australia. Tel: +613 9594 5145. Fax: +613 9594 5003.  
32  
33 E-mail: euan.wallace@monash.edu  
34  
35  
36

37  
38  
39 **Keywords:** Fetal growth restriction, melatonin, clinical trial, oxidative stress,  
40  
41 antenatal neuroprotection.  
42  
43

44  
45  
46 **Word count:** 3143.  
47  
48  
49  
50  
51  
52  
53  
54  
55  
56  
57  
58  
59  
60

## ABSTRACT

**Background:** Fetal growth restriction complicates about 5% of pregnancies and is commonly caused by placental dysfunction. It is associated with increased risks of perinatal mortality and short- and long-term morbidity, such as cerebral palsy. Chronic *in utero* hypoxaemia, inflammation and oxidative stress are likely culprits contributing to the long-term neurological sequelae of fetal growth restriction. In this regard we propose that melatonin, a powerful antioxidant, might mitigate morbidity and/or mortality associated with fetal growth restriction. Melatonin has an excellent biosafety profile and crosses the placenta and blood brain barrier. We present the protocol for a phase I clinical trial to investigate the efficacy of maternal oral melatonin administration in women with a pregnancy complicated by fetal growth restriction.

**Methods and analysis:** The proposed trial is a single-arm open-label clinical trial involving 12 women. Severe, early onset fetal growth restriction will be diagnosed by estimated fetal weight  $\leq 10^{\text{th}}$  centile in combination with abnormal fetoplacental Doppler studies, occurring before 34 weeks of pregnancy. Baseline measurements of maternal and fetal wellbeing, levels of oxidative stress and ultrasound and Doppler measurements will be obtained at the time of diagnosis of fetal growth restriction. Women will then commence melatonin treatment (4mg) twice daily until birth. The primary outcomes are the levels of oxidative stress in the maternal and fetal circulation and placenta. Secondary outcomes are fetoplacental Doppler studies (uterine artery, middle cerebral artery, and ductus venosus), fetal biometry, fetal biophysical profile and a composite determination

1  
2  
3 of neonatal outcome. A historical cohort of gestational matched fetal growth  
4  
5 restriction and a healthy pregnancy cohort will be used as comparators.  
6  
7

8  
9  
10 **Ethics and dissemination:** Ethical approval has been obtained from Monash  
11  
12 Health Human Research Ethics Committee B (HREC12133B). Data will be  
13  
14 presented at international conferences and published in peer-reviewed journals.  
15  
16

17  
18  
19 **Trial registration number:** Clinical Trials, protocol registration system:  
20  
21 NCT01695070.  
22  
23  
24  
25  
26  
27  
28  
29  
30  
31  
32  
33  
34  
35  
36  
37  
38  
39  
40  
41  
42  
43  
44  
45  
46  
47  
48  
49  
50  
51  
52  
53  
54  
55  
56  
57  
58  
59  
60



## ARTICLE SUMMARY

### Article focus:

- This trial aims to establish the clinical and/or biochemical benefit of maternally administered melatonin as an antioxidant treatment in pregnancies affected by fetal growth restriction.
- Specific aims are:
  - To determine the effect of daily maternal oral melatonin on levels of oxidative stress in the placenta and in the maternal and fetal circulation in pregnancies affected by early onset fetal growth restriction.
  - To determine the effect of daily maternal oral melatonin on the clinical outcomes of pregnancies affected by early onset fetal growth restriction.
  - To determine the effect of daily maternal oral melatonin on brain injury and neurologic development in growth restricted newborn babies.

### Key messages:

- Fetal growth restriction is a serious pregnancy complication and is associated with significant fetal and neonatal morbidity and mortality. Fetal brain injury is common in fetal growth restriction.

- Brain injury in survivors of fetal growth restriction is likely to originate antenatally as a consequence of oxidative stress.
- There are currently no established treatments for fetal growth restriction or for neuroprotection in fetal growth restriction.
- Numerous animal studies have established the use of melatonin as an antenatal antioxidant and neuroprotectant in acute and chronic hypoxia. In this study we aim to explore whether melatonin is an effective antioxidant in the treatment of human fetal growth restriction.

Strengths and limitations of this study:

- This pilot study has an appropriate design, and includes sufficient participants, to achieve measureable outcomes. Extensive previous human and animal studies form the basis for the design of this trial.
- This pilot study is the first of its kind in the world. Being a pilot study, this trial lacks randomisation and a placebo group, although comparator groups are included. If this trial is successful, results will be used to inform future randomized controlled trials.

## INTRODUCTION

Fetal growth restriction (FGR) defines the fetus that does not realise its normal growth potential. This significant pregnancy complication accounts for about 5 percent of all pregnancies(1). FGR is most commonly caused by placental dysfunction(2). FGR is strongly associated with increased risks of preterm birth, perinatal death, and, among survivors, significant cardiovascular and neurological morbidities, including cerebral palsy(3-7).

State-of-the-art fetal surveillance techniques are important in the diagnosis and surveillance of the growth restricted fetus, and afford timely delivery. However, with the exception of antenatal glucocorticoids there are currently no treatments to reduce the short- and long-term morbidities associated with FGR(8). In FGR, injury to the developing fetal brain is likely to principally occur *in utero*, emphasizing that, if the burden of neurological morbidity is to be reduced, then antenatal neuroprotective treatment, as opposed to postnatal therapy, will be necessary. Thus, future treatment should be directed at protecting fetal brain development and reducing the incidence of brain injury before birth rather than solely focusing on care in the nursery.

Although many *in utero* events can perturb normal fetal brain development, it is thought that chronic fetoplacental hypoxaemia and oxidative stress are the likely key mechanisms initiating pathways leading to brain injury(9). In placental dysfunction, the placenta is exposed to recurrent ischaemia-reperfusion injury, ultimately leading to decreased placental oxygen transfer capacity.

Consequently, the placenta cannot adequately meet the growing metabolic needs

1  
2  
3 of the fetus, which in turn becomes progressively hypoxaemic. Compensatory  
4 fetal mechanisms attempt to maintain adequate oxygenation, particularly of the  
5 heart and brain. Nevertheless, these eventually fail and a complex cascade of  
6 metabolic events is initiated that involves the generation of nitrogen and oxygen  
7 free radicals(10).  
8  
9

10  
11  
12  
13  
14  
15 The central nervous system, and in particular the fetal brain, is particularly  
16 susceptible to free radical damage(11). Low antioxidant defenses and abundant  
17 iron within the fetal brain render it vulnerable to oxidative stress. Further, the  
18 fetal brain is rich in membrane lipids that are sensitive to free radical attack.  
19

20  
21  
22  
23  
24 Indeed, lipid peroxidation plays an important role in neuronal and white matter  
25 damage directly and indirectly. Byproducts of lipid peroxidation can trigger  
26 vasoconstriction(12), and are cytotoxic, mutagenic and teratogenic(13–15).  
27  
28

29  
30  
31  
32  
33  
34  
35  
36  
37  
38  
39  
40  
41  
42  
43  
44  
45  
46  
47  
48  
49  
50  
51  
52  
53  
54  
55  
56  
57  
58  
59  
60  
Magnetic resonance imaging of preterm infants with white matter injury show  
significantly higher levels of protein and lipid peroxidation(16). Furthermore, in  
an autopsy study on human brain tissue, activated microglia, significant protein  
nitration, lipid peroxidation and cell injury were all detected in premyelinating  
oligodendrocytes in babies diagnosed with periventricular leukomalacia(17).

Melatonin (5-methoxy-N-acetyltryptamine) is an endogenous lipid-soluble  
hormone, predominantly produced in the pineal gland that is best recognized for  
its role in providing circadian and seasonal timing cues. It is also a strong  
antioxidant. It effectively scavenges free radicals, induces endogenous  
antioxidant enzymes, such as glutathione peroxidase and glutathione  
reductase(18), and inhibits the pro-oxidative enzyme nitric oxide synthase(19).

Melatonin also stabilizes cell membranes, enhancing their resistance to oxidative

1  
2  
3 damage(20). *In vitro*, melatonin treatment protects the villous trophoblast  
4 against hypoxia-reperfusion induced oxidative stress and apoptosis(21). Due to  
5  
6 its strong antioxidant capacity and its ability to cross the human placenta(22)  
7  
8 and blood-brain barrier(23), melatonin is of particular interest as a candidate  
9  
10 antenatal neuroprotectant. The neuroprotective potential of melatonin is  
11  
12 augmented by the fact that melatonin inhibits norepinephrine-induced middle  
13  
14 cerebral artery constriction(24) and induces umbilical vasodilation(25) in ovine  
15  
16 models of fetal growth restriction. *In animal models, we* have shown that  
17  
18 melatonin treatment before and during transient severe fetal asphyxia  
19  
20 prevented the formation of hydroxyl radicals within the fetal brain(26), reduced  
21  
22 lipid peroxidation and cell death and stabilized the blood-brain-barrier(27).  
23  
24 Administration of melatonin at the time of induced hypoxia in the fetal sheep  
25  
26 brain also reduced inflammation and cell death(28). Using an established ovine  
27  
28 model of fetal growth restriction(29), we have now shown that maternal  
29  
30 administration of melatonin reduced fetal hypoxia, improved  
31  
32 neurodevelopment and decreased brain injury and oxidative stress in newborn  
33  
34 lambs(*SL Miller, unpublished data 2013*).

35  
36  
37 Melatonin treatment during human pregnancy has been studied for a large range  
38  
39 of conditions and at different times during gestation. Predominantly, melatonin  
40  
41 has been studied in assisted reproductive technology, aiming to improve oocyte  
42  
43 quality and pregnancy rates following *in vitro* fertilization (IVF). Melatonin  
44  
45 administration, commenced prior to IVF-cycles and continued during pregnancy,  
46  
47 was associated with modestly improved pregnancy outcomes(30-32).  
48  
49  
50 Importantly, all babies that were born from melatonin-treated pregnancies were  
51  
52  
53  
54  
55  
56  
57  
58  
59  
60

1  
2  
3 born healthy and with no congenital abnormalities (*V. Unfer. personal*  
4 *communication, 2012*). Furthermore, maternal treatment with melatonin  
5  
6 significantly boosts placental antioxidant enzyme gene expression(22).  
7  
8

9  
10 Except for its known, benign effects on sleep dynamics, melatonin does not exert  
11 acute pharmacological effects on the nervous or vascular system. A median lethal  
12 dose in mice could not be calculated because an increased mortality rate was not  
13 observed, even following extremely high doses of up to 800mg/kg  
14  
15 melatonin(33). Long term nightly oral treatment with 75mg melatonin in 1400  
16  
17 non-pregnant women did not cause any serious adverse effects(34). To our  
18  
19 knowledge, no maternal and/or developmental toxicity effects, due to melatonin  
20  
21 treatment, have been reported. The maternal no adverse effect level (NOAEL)  
22  
23 and lowest observed adverse effect level (LOAEL) were established at 100 and  
24  
25 200mg/kg/day, respectively, for maternally administered melatonin in pregnant  
26  
27 rats. The developmental toxicity NOAEL was  $\geq 200\text{mg/kg/day}$ (35).  
28  
29  
30  
31  
32  
33  
34  
35  
36

37 **Rationale:** Fetal growth restriction is a serious pregnancy complication,  
38 affecting up to 5% of pregnancies. It is associated with significant fetal and  
39 neonatal mortality and morbidity, including neurological impairment. Even  
40  
41 though modern obstetrics allows for careful fetal monitoring, there are neither  
42  
43 effective therapies for fetal growth restriction nor established options for  
44  
45 antenatal neuroprotection in fetal growth restriction. Numerous animal studies  
46  
47 have established the use of melatonin as an effective antenatal antioxidant and  
48  
49 neuroprotectant in acute and chronic hypoxia. In this trial we aim to explore, for  
50  
51 the first time, whether melatonin is an effective antioxidant in human fetal  
52  
53 growth restriction. In this trial we aim to explore, for  
54  
55 the first time, whether melatonin is an effective antioxidant in human fetal  
56  
57 growth restriction.  
58  
59  
60

1  
2  
3 **Aims:** We will establish the clinical and/or biochemical benefit of maternally  
4 administered melatonin as an antioxidant treatment in pregnancies affected by  
5 fetal growth restriction.  
6  
7  
8

9  
10 Specific aims are:

- 11  
12  
13  
14 1. To determine the effect of daily maternal oral melatonin on markers of  
15 oxidative stress in the placenta, and maternal and fetal circulations in  
16 pregnancies affected by early onset fetal growth restriction.  
17  
18  
19 2. To determine the effect of daily maternal oral melatonin on the clinical  
20 outcomes of pregnancies affected by early onset fetal growth restriction.  
21  
22  
23 3. To determine the effect of daily maternal oral melatonin on brain injury and  
24 neurodevelopment in growth restricted newborn babies.  
25  
26  
27  
28  
29  
30  
31  
32  
33

## 34 **METHODS AND ANALYSIS**

35  
36  
37 **Study design:** Phase I single-arm open label clinical trial, with historic cohorts of  
38 FGR and healthy pregnancies as comparators.  
39  
40  
41  
42  
43

44 **Subjects:** Twelve women (pregnancies) with fetal growth restriction will be  
45 recruited and studied to completion of the trial. A historical cohort of gestational  
46 matched fetal growth restriction and a healthy pregnancy cohort will be used as  
47 comparators.  
48  
49  
50  
51  
52  
53  
54  
55  
56  
57  
58  
59  
60

1  
2  
3 **Patient eligibility:** Pregnant women with a singleton growth restricted fetus  
4  
5 between 23<sup>+0</sup> and 34<sup>+0</sup> weeks (confirmed gestational age). Fetal growth  
6  
7 restriction will be defined as a sonographic estimated fetal weight at or below  
8  
9 the 10<sup>th</sup> centile for gestational age in combination with at least one abnormal  
10  
11 fetoplacental Doppler study of the uterine artery (bilateral uterine artery  
12  
13 notching or unilateral uterine artery notching on the ipsilateral side of the  
14  
15 placenta), umbilical artery (systolic:diastolic ratio  $\geq 95^{\text{th}}$  centile or absent, or,  
16  
17 reversed end-diastolic flow), middle cerebral artery (pulsatility index  $\leq 5^{\text{th}}$   
18  
19 centile) or ductus venosus (abnormal A wave and/or pulsatility index  $\geq 95^{\text{th}}$   
20  
21 centile). For consenting purposes, mothers must be 18 years or older and have a  
22  
23 basic understanding of English. Women with an unconfirmed pregnancy  
24  
25 duration, a multiple pregnancy, or a pregnancy affected by maternal or fetal  
26  
27 infection, or with a fetus with a chromosomal or major structural anomaly or  
28  
29 non-placental fetal growth restriction will be excluded from this trial.  
30  
31  
32  
33  
34  
35  
36  
37  
38  
39

40 **Recruitment:** Patients will be recruited from the maternity services of Monash  
41  
42 Health and Jessie McPherson Private Hospital, Melbourne, Australia. The study  
43  
44 will be staffed with a clinical research team, who will inform potential  
45  
46 participants about the aims, methods and potential risks and benefits of this  
47  
48 study. Subjects will be informed that their participation is voluntary and that  
49  
50 they may withdraw consent to participate at any time during the study, and for  
51  
52 any reason, and that choosing not to participate or withdraw will not affect their  
53  
54 care. An information form about the trial and opportunities to ask questions will  
55  
56  
57  
58  
59  
60



1  
2  
3 be offered to the woman and any other person(s) she chooses. Women will be  
4  
5 recruited to the study following written informed consent.  
6  
7  
8  
9

10 **Trial treatment:** Following recruitment, and until delivery, women will receive  
11 oral melatonin prolonged release (Circadin®, Neurim Pharmaceuticals), 4mg  
12 twice daily (a total daily dose of 8mg) approximately 12 hours apart. This dose  
13 and regimen are based on results from our own experimental animal research,  
14 previously published animal research, and clinical trials.  
15  
16  
17  
18  
19

20  
21  
22  
23 In our experimental FGR-study a maternal, cumulative, intravenous dose of  
24 6.0mg/day was administered. The human equivalent dose (HED) was calculated  
25 using the FDA-dose-conversion algorithm(36) and the average Australian height  
26 and weight. This resulted in a dose between 7.3mg/day (based on pre-pregnancy  
27 weight) and 8.1mg/day (based on end-pregnancy weight). As Circadin® is only  
28 available in 2mg tablets, the chosen dose for this study is 8mg per day.  
29  
30  
31  
32  
33  
34  
35  
36  
37  
38

39 This dose of melatonin is lower than the used doses in several clinical studies in  
40 neonates. These trials evaluated melatonin as an antioxidant treatment in  
41 newborns with birth asphyxia and other conditions associated with increased  
42 oxidative stress. Melatonin was administered orally in doses up to 80mg/day in  
43 these trials without any toxicity(37–41). In clinical trials using melatonin to  
44 improve assisted reproductive technology, melatonin was administered orally in  
45 doses of 3mg/day before and during pregnancy(30,32,42). Melatonin treatment,  
46 started prior to conception and continued until birth, did not adversely affect  
47 pregnancy outcome and fetal or neonatal health (V. Unfer. personal  
48  
49  
50  
51  
52  
53  
54  
55  
56  
57  
58  
59  
60

1  
2  
3 communication, 2012). The dose in this trial is higher than previously used doses  
4 in human pregnancy but still falls well below the maternal and fetal NOAEL (HED  
5 16 and 32mg/kg respectively) and maternal LOAEL (HED 32mg/kg).  
6  
7  
8

9  
10  
11 Melatonin will be administered orally as 4mg given twice per day. This dosage  
12 regimen is chosen because the terminal half-life of Circadin® is 3.5 to 4 hours. In  
13 fetal growth restriction, increased levels of oxidative stress likely occur due to  
14 continuous placental generation of reactive oxygen species. By administering  
15 melatonin twice daily, we aim to provide a sustained increase in maternal and  
16 fetal serum. To minimize daytime sleepiness and severe disturbances of  
17 circadian rhythms, melatonin will be given early in the morning and at night.  
18  
19  
20  
21  
22  
23  
24  
25  
26  
27  
28  
29

30 **Sample collection:** Prior to starting melatonin, a maternal blood sample will be  
31 taken and ultrasound and Doppler measurements will be obtained. This will be  
32 repeated once per week until birth. Immediately prior to birth, a maternal blood  
33 sample will be obtained. At the time of birth, samples of the amniotic fluid,  
34 umbilical cord blood and placenta will be collected. Clinical details of pregnancy,  
35 including medication and (multi) vitamin use, delivery and neonatal outcomes  
36 will be recorded in pre-specified case record forms.  
37  
38  
39  
40  
41  
42  
43  
44  
45  
46  
47

48 All blood samples will be collected in serum tubes and blood RNA tubes, allowing  
49 for measurement of markers of oxidative stress and gene expression studies  
50 respectively. Serum tubes will be centrifuged (4400g, 15 minutes). The serum  
51 will be collected and transferred into collection tubes. The collection tubes will  
52 be stored in a -80°C until further processing.  
53  
54  
55  
56  
57  
58  
59  
60

1  
2  
3  
4  
5 Amniotic fluid will be collected during caesarean section deliveries. The  
6 myometrium will be bisected sharply and distinctly from the amnion and  
7 chorion. The amniotic fluid will be aspirated using a sterile syringe and 18 gauge  
8 drawing-up needle. Samples visibly contaminated with blood will be discarded  
9 off. Within 30 minutes of the sample collection, specimens will be transferred to  
10 a laboratory. The samples will be centrifuged (1000g, 15 minutes) and the  
11 supernatant will be collected, transferred into sterile collection tubes and snap  
12 frozen. Specimens will be stored at -80°C until further analysis.

13  
14  
15  
16  
17  
18  
19  
20  
21  
22  
23  
24  
25  
26 Placentas will be obtained at time of delivery and placed in a sterile tray. The  
27 area at the midpoint of the longest distance between the cord insertion and the  
28 edge of the placental disc will be sampled. Six full thickness placental samples  
29 will be cut out using sterile scissors. The placental tissue samples will be  
30 removed from the membranes using sterile forceps and scissors. The placental  
31 tissue samples will then be washed in a sterile container using ice cold, sterile  
32 phosphate-buffered saline. Two tissue samples will be fixed in 4%  
33 paraformaldehyde and embedded in paraffin for histological analysis. Two tissue  
34 samples will be placed in sterile tubes containing RNA-later for 24 hours at 4°C.  
35 After immersion in RNA-later, these two samples will be transferred into two  
36 sterile cryovials, snap frozen in liquid nitrogen and stored at -80°C until further  
37 processing for gene expression studies. The remaining tissue samples will be  
38 placed into sterile cryovials and snap frozen in liquid nitrogen. Samples will be  
39 stored in a -80°C freezer until further processing to measure levels of oxidative  
40 stress and melatonin.  
41  
42  
43  
44  
45  
46  
47  
48  
49  
50  
51  
52  
53  
54  
55  
56  
57  
58  
59  
60

1  
2  
3  
4  
5  
6  
7  
8 **Outcome measures:** The primary outcome will be the level of oxidative stress  
9  
10 in the placenta and in the maternal (before and during treatment and at  
11 delivery) and fetal (umbilical artery and vein at delivery) circulations, as  
12 reflected by the measurement of malondialdehyde, 8-isoprostane, total  
13 antioxidant capacity and superoxide dismutase. Levels of melatonin will be  
14 measured in maternal and fetal blood and in the placenta. Gene expression of  
15 pro- and antioxidant enzymes, melatonin synthesizing enzymes, melatonin  
16 receptors and clock genes will be measured in the placenta and in the maternal  
17 and fetal blood.  
18  
19  
20  
21  
22  
23  
24  
25  
26  
27  
28  
29

30 The secondary outcome measures will include clinical parameters about the  
31 pregnancy and its duration, fetal and neonatal wellbeing, mortality and  
32 morbidity (Tables 1-4).  
33  
34  
35  
36  
37  
38  
39  
40  
41  
42  
43  
44  
45  
46  
47  
48  
49  
50  
51  
52  
53  
54  
55  
56  
57  
58  
59  
60

**Table 1: Ultrasound and Doppler measurements.**


---

**Doppler and ultrasound measurements:** at recruitment and then weekly until delivery.

---

Doppler velocimetry: umbilical artery, middle cerebral artery, ductus venosus, and maternal uterine arteries

Biometry (fortnightly)

Amniotic fluid index

Fetal behaviour: heart rate, tone, breathing, gross body movements

---

**Table 2: Maternal morbidity.**


---

**Markers of maternal morbidity:** at recruitment and at least weekly until delivery.

---

Blood pressure

Complete blood count

Liver function tests (AST, ALT, GTT, bilirubin)

Renal function tests (urea, creatinine, uric acid)

---

**Table 3: Pregnancy end-points****Pregnancy outcomes:**

Gestational age at birth

Diagnosis to delivery interval

Abnormal cardiotocogram

Indication for delivery (if not spontaneous)

Mode of birth

Labour analgesia/anaesthesia

Duration of labour stages

Duration of membrane rupture to birth

Used medication such as antihypertensives, magnesium sulphate and corticosteroids.

Use of (multi) vitamins and dietary supplements

**Table 4: Neonatal outcomes.****Neonatal outcomes:**

Sex

Apgar scores (1, 5, 10 minutes)

Birth weight

Cord artery S100B

Head circumference at birth

Composite neonatal outcome: admission to neonatal intensive care unit,

duration of admission, need for and duration of respiratory support,

intraventricular haemorrhage, necrotizing enterocolitis, abnormal neurology,

mortality prior to discharge

---

**Follow up of women and infants:** Participants will be followed weekly for the duration of the trial. The routine clinical care of participants, including ultrasound scans, will not be affected by participation in the study. During the weekly follow-up, fetal and maternal wellbeing will be assessed and women will discuss any issues that they have experienced. Medication will be supplied weekly to meet the requirements for the following week. Women will be asked to keep a medication and symptom diary (drowsiness, sleepiness, general physical well-being, time of melatonin intake), which will be reviewed weekly by the principal investigator. Melatonin treatment will cease as soon as birth has occurred. Postnatal clinical care of the women will be the responsibility of the attending obstetric team. The principal investigator will assess the clinical condition of participants daily during the first three days post-partum, to ensure that no problems become apparent in response to withdrawal from treatment. Clinical data will be obtained from neonates who require admission to the neonatal intensive care unit. Long-term follow-up using neurodevelopmental examination and questionnaires and MRI scans, are desirable but will depend on funding.

**Sample size and statistical analysis of data:** This study is a proof-of-principle phase I trial. As such, there are no current data available to undertake a formal power calculation to determine the sample size. If successful, this exploratory study will provide the measures needed to perform the power calculations

1  
2  
3 required for the planned phase II randomized-controlled trial. This trial will  
4  
5 provide data for the establishment of the use of maternal melatonin treatment in  
6  
7 fetal growth restriction.  
8

9  
10 The results obtained in this trial will be compared to historic cohorts of  
11  
12 untreated fetal growth restriction and healthy pregnancies, which we have been  
13  
14 collecting since 2011, using the same protocol.  
15

16 Biomarkers of oxidative stress in the maternal blood samples will be analysed  
17  
18 using a repeated measures analysis of variance, including the baseline value as a  
19  
20 covariate. It is assumed that the effect of treatment with melatonin on levels of  
21  
22 oxidative stress will not depend on duration of treatment. However, secondary  
23  
24 analysis will be performed to determine the effect of treatment duration on  
25  
26 biomarkers of oxidative stress. If the treatment duration significantly impacts on  
27  
28 the effect of melatonin on the oxidative stress status, this will be further  
29  
30 investigated using the least-square measure. Data will be plotted as mean scores  
31  
32 over time.  
33  
34  
35  
36  
37  
38

39 Biomarkers of oxidative stress in the maternal blood samples will be analysed  
40  
41 using a repeated measures analysis of variance, including the baseline value as a  
42  
43 covariate. Levels of oxidative stress in the maternal blood sample obtained  
44  
45 immediately prior to birth will be compared to samples derived from the historic  
46  
47 cohorts using a one-way ANOVA. Levels of oxidative stress and brain injury will  
48  
49 be compared to data obtained from the previously described historic cohorts.  
50  
51 Clinical data regarding maternal wellbeing, pregnancy outcome and neonatal  
52  
53 outcome will be compared to the same cohorts. These data will be analysed using  
54  
55 a one-way ANOVA.  
56  
57  
58  
59  
60



1  
2  
3  
4  
5 A p-value  $\leq 0.05$  is considered to be statistically significant.  
6  
7  
8

9  
10 **Adverse events and safety monitoring:** During the treatment period, clinical  
11 care will remain unchanged and will be the responsibility of uninvolved medical  
12 staff. The principal investigator will monitor all participants weekly, take a brief  
13 medical history, measure blood pressure and interpret ultrasound scan results  
14 (obtained by uninvolved staff) to ensure melatonin treatment can be safely  
15 continued. A weekly blood sample will be obtained to perform a full blood  
16 examination, assess liver and renal function and assess C-reactive protein. For  
17 the duration of the trial, the principal investigator will be contactable by  
18 telephone at all times.  
19  
20  
21  
22  
23  
24  
25  
26  
27  
28

29  
30 Any adverse medical events reported by the patient will be recorded in the  
31 patients' medical records at each visit. Serious adverse events occurring after  
32 initiation of the trial will be reported to the Monash Health Human Research  
33 Ethics committee, Therapeutics Committee and Therapeutic Goods  
34 Administration of Australia's Office of Scientific Evaluation within 72 hours.  
35  
36  
37  
38  
39  
40  
41  
42  
43

#### 44 **Trial discontinuation or modification**

45  
46 The participants can end participation at their own request at any time.  
47  
48 Participants will be withdrawn from the trial if they or their fetus suffer from an  
49 unexpected serious adverse event. Worsening of fetoplacental Doppler  
50 velocimetry or fetal growth are within the natural history of fetal growth  
51 restriction and are not part of the discontinuation criteria.  
52  
53  
54  
55  
56  
57  
58  
59  
60

1  
2  
3 **Ethics and dissemination:** This study has been approved by the Monash Health  
4  
5 Human Research Ethics Committee B (HREC 12133B). Data will be presented at  
6  
7 relevant conferences and published in peer-reviewed journals.  
8  
9

## 10 11 12 **DISCUSSION**

13  
14  
15  
16  
17 The use of melatonin as an antenatal antioxidant therapy in fetal growth  
18  
19 restriction has been proposed as a promising and safe option to protect the fetal  
20  
21 brain from injury. This trial is essential to confirm the antioxidant capacity and  
22  
23 safety of melatonin treatment. If this study confirms that maternal melatonin can  
24  
25 decrease maternal, fetal and/or placental levels of oxidative stress, we will  
26  
27 proceed to a phase II randomized-controlled trial to assess the effect of maternal  
28  
29 melatonin treatment on brain injury and neurodevelopment. In addition,  
30  
31 melatonin treatment could also potentially be used as an antenatal  
32  
33 neuroprotectant in other compromised pregnancies or in threatened preterm  
34  
35 birth to protect the mother and/or fetus. Finally, if melatonin treatment indeed  
36  
37 strengthens antioxidant defenses during pregnancy, it might be a suitable new  
38  
39 strategy in the management of pre-eclampsia. A phase I study to study the  
40  
41 clinical and biochemical benefit of melatonin treatment in preeclampsia has been  
42  
43 initiated.  
44  
45  
46  
47  
48  
49  
50

## 51 52 **AUTHORS' CONTRIBUTIONS**

53  
54  
55 NOA: research, contribution of original material, editing and approval of final  
56  
57 manuscript. SLM, GJ, EMW: editing and approval of final manuscript.  
58  
59  
60

**FUNDING STATEMENT**

This work was supported by the 5Point Foundation.

**COMPETING INTERESTS**

NOA is funded by a Monash Graduate Scholarship and a Monash International Postgraduate Research Scholarship.

## REFERENCES

1. [Robert R. Intrauterine growth restriction. Obstet Gynecol. 2002 Mar;99\(3\):490--496.](#)
2. [Warkany J, Monroe BB, Sutherland BS. Intrauterine Growth Retardation. Am J Dis Child. 1961 Aug;102\(2\):249-79.](#)
3. [Chase HC. A study of infant mortality from linked records: comparison of neonatal mortality from two cohort studies. United States, January-March 1950 and 1960. Vital Health Stat 20 Data Natl Vital Stat Syst. 1972 Jun;13:1--99.](#)
4. [Ghidini A. Doppler of the Ductus Venosus in Severe Preterm Fetal Growth Restriction. Obstet Gynecol. 2007 Feb;109\(2, Part 1\):250-2.](#)
5. [Bernstein IM, Horbar JD, Badger GJ, Ohlsson A, Golan A. Morbidity and mortality among very-low-birth-weight neonates with intrauterine growth restriction. The Vermont Oxford Network. Am J Obstet Gynecol. 2000 Jan;182\(1 Pt 1\):198--206.](#)
6. [Ross MG, Beall MH. Adult Sequelae of Intrauterine Growth Restriction. Semin Perinatol. 2008 Jun;32\(3\):213-8.](#)
7. [Barker DJ. In utero programming of chronic disease. Clin Sci Lond Engl 1979. 1998 Aug;95\(2\):115-28.](#)
8. [Miller SL, Wallace EM. Effect of Antenatal Steroids on Haemodynamics in the Normally Grown and Growth Restricted Fetus. Curr Pediatr Rev. 2013 Feb 1;9\(1\):67-74.](#)
9. [Miller SL, Wallace EM, Walker DW. Antioxidant Therapies: A Potential Role in Perinatal Medicine. Neuroendocrinology \[Internet\]. 2012.](#)
10. [Love S. Oxidative stress in brain ischemia. Brain Pathol Zurich Switz. 1999 Jan;9\(1\):119-31.](#)
11. [Halliwell B. Reactive oxygen species and the central nervous system. J Neurochem. 1992 Nov;59\(5\):1609-23.](#)
12. [Morrow JD, Minton TA, Roberts II LJ. The F2-isoprostane, 8-epi-prostaglandin F2  \$\alpha\$ , a potent agonist of the vascular thromboxane/endoperoxide receptor, is a platelet thromboxane/endoperoxide receptor antagonist. Prostaglandins. 1992 Aug;44\(2\):155-63.](#)
13. [Schmidt H, Grune T, Müller R, Siems WG, Wauer RR. Increased levels of lipid peroxidation products malondialdehyde and 4-hydroxynonenal after perinatal hypoxia. Pediatr Res. 1996 Jul;40\(1\):15-20.](#)

14. [Wentzel P, Eriksson UJ. 8-Iso-PGF2  \$\alpha\$  administration generates dysmorphogenesis and increased lipid peroxidation in rat embryos in vitro. Teratology. 2002;66\(4\):164–8.](#)
15. [Marnett LJ. Lipid peroxidation—DNA damage by malondialdehyde. Mutat Res Mol Mech Mutagen. 1999 Mar;424\(1–2\):83–95.](#)
16. [Inder T, Mocatta T, Darlow B, Spencer C, Volpe JJ, Winterbourn C. Elevated free radical products in the cerebrospinal fluid of VLBW infants with cerebral white matter injury. Pediatr Res. 2002 Aug;52\(2\):213–8.](#)
17. [Haynes RL, Folkerth RD, Keefe RJ, Sung I, et al. Nitrosative and oxidative injury to premyelinating oligodendrocytes in periventricular leukomalacia. J Neuropathol Exp Neurol. 2003 May;62\(5\):441–50.](#)
18. [Pablos MI, Chuang J, Reiter RJ, Ortiz GG, Daniels WM, Sewerynek E, et al. Time course of the melatonin-induced increase in glutathione peroxidase activity in chick tissues. Biol Signals. 1995;4\(6\):325–30.](#)
19. [Pozo D, Reiter RJ, Calvo JR, Guerrero JM. Inhibition of cerebellar nitric oxide synthase and cyclic GMP production by melatonin via complex formation with calmodulin. J Cell Biochem. 1997 Jun;65\(3\):430–42.](#)
20. [García JJ, Reiter RJ, Guerrero JM, Escames G, Yu BP, Oh CS, et al. Melatonin prevents changes in microsomal membrane fluidity during induced lipid peroxidation. FEBS Lett. 1997 May;408\(3\):297–300.](#)
21. [Lanoix D, Lacasse A-A, Reiter RJ, Vaillancourt C. Melatonin: The watchdog of villous trophoblast homeostasis against hypoxia/reoxygenation-induced oxidative stress and apoptosis. Mol Cell Endocrinol. 2013 Dec 5;381\(1–2\):35–45.](#)
22. [Okatani Y, Okamoto K, Hayashi K, Wakatsuki A, Tamura S, Sagara Y. Maternal - fetal transfer of melatonin in pregnant women near term. J Pineal Res. 1998 Nov;25\(3\):129–34.](#)
23. [Okatani Y, Wakatsuki A, Kaneda C. Melatonin increases activities of glutathione peroxidase and superoxide dismutase in fetal rat brain. J Pineal Res. 2000 Mar;28\(2\):89–96.](#)
24. [Torres-Farfan C, Valenzuela FJ, Mondaca M, Valenzuela GJ, Krause B, Herrera EA, et al. Evidence of a role for melatonin in fetal sheep physiology: direct actions of melatonin on fetal cerebral artery, brown adipose tissue and adrenal gland. J Physiol. 2008 Aug;586\(16\):4017–27.](#)
25. [Thakor AS, Herrera EA, Serón - Ferré M, Giussani DA. Melatonin and vitamin C increase umbilical blood flow via nitric oxide - dependent mechanisms. J Pineal Res. 2010 Nov;49\(4\):399–406.](#)

- 1  
2  
3  
4  
5  
6  
7  
8  
9  
10  
11  
12  
13  
14  
15  
16  
17  
18  
19  
20  
21  
22  
23  
24  
25  
26  
27  
28  
29  
30  
31  
32  
33  
34  
35  
36  
37  
38  
39  
40  
41  
42  
43  
44  
45  
46  
47  
48  
49  
50  
51  
52  
53  
54  
55  
56  
57  
58  
59  
60
26. [Miller SL, Yan EB, Castillo-Melendez M, Jenkin G, Walker DW. Melatonin Provides Neuroprotection in the Late-Gestation Fetal Sheep Brain in Response to Umbilical Cord Occlusion. Dev Neurosci. 2005;27\(2-4\):200-10.](#)
27. [Yawno T, Castillo-Melendez M, Jenkin G, Wallace EM, Walker DW, Miller SL. Mechanisms of melatonin-induced protection in the brain of late gestation fetal sheep in response to hypoxia. Dev Neurosci. 2012;34\(6\):543-51.](#)
28. [Welin A-K, Svedin P, Lapatto R, Sultan B, Hagberg H, Gressens P, et al. Melatonin Reduces Inflammation and Cell Death in White Matter in the Mid-Gestation Fetal Sheep Following Umbilical Cord Occlusion. Pediatr Res. 2007 Feb;61\(2\):153-8.](#)
29. [Supramaniam VG, Jenkin G, Loose J, Wallace EM, Miller SL. Chronic fetal hypoxia increases activin A concentrations in the late-pregnant sheep. BJOG Int J Obstet Gynaecol. 2006 Jan;113\(1\):102-9.](#)
30. [Unfer V, Raffone E, Rizzo P, Buffo S. Effect of a supplementation with myo-inositol plus melatonin on oocyte quality in women who failed to conceive in previous in vitro fertilization cycles for poor oocyte quality: a prospective, longitudinal, cohort study. Gynecol Endocrinol. 2011 Nov;27\(11\):857-61.](#)
31. [Tamura H, Nakamura Y, Terron MP, Flores LJ, Manchester LC, Tan D-X, et al. Melatonin and pregnancy in the human. Reprod Toxicol. 2008 Apr;25\(3\):291-303.](#)
32. [Benedetto PPRERV. Effect of the treatment with myo-inositol plus folic acid plus melatonin in comparison with a treatment with myo-inositol plus folic acid on oocyte quality and pregnancy outcome in IVF cycles. A prospective, clinical trial. Eur Rev Med Pharmacol Sci. 2010 Jun;14\(6\):555.](#)
33. [Barchas J, Dacosta F, Spector S. Acute Pharmacology of Melatonin. Nature. 1967 May;214\(5091\):919-920.](#)
34. [Silman RE. Melatonin: a contraceptive for the nineties. Eur J Obstet Gynecol Reprod Biol. 1993 Apr;49\(1-2\):3-9.](#)
35. [Jahnke G, Marr M, Myers C, Wilson R, Travlos G, Price C. Maternal and developmental toxicity evaluation of melatonin administered orally to pregnant Sprague-Dawley rats. Toxicol Sci Off J Soc Toxicol. 1999 Aug;50\(2\):271-9.](#)
36. [FDA USF and DA. Guidance for Industry: Estimating the Maximum Safe Starting Dose in Initial Clinical Trials for Therapeutics in Adult Healthy Volunteers. 2005.](#)
37. [Gitto E, Reiter RJ, Cordaro SP, La Rosa M, Chiurazzi P, Trimarchi G, et al. Oxidative and inflammatory parameters in respiratory distress syndrome of](#)

1  
2  
3 [preterm newborns: beneficial effects of melatonin. Am J Perinatol. 2004](#)  
4 [May;21\(4\):209-16.](#)  
5

6 38. [Gitto E, Romeo C, Reiter RJ, Impellizzeri P, Pesce S, Basile M, et al. Melatonin](#)  
7 [reduces oxidative stress in surgical neonates. J Pediatr Surg. 2004](#)  
8 [Feb;39\(2\):184-189; discussion 184-189.](#)  
9

10 39. [Gitto E, Karbownik M, Reiter RJ, Tan DUNX, Cuzzocrea S, Chiurazzi P, et al.](#)  
11 [Effects of melatonin treatment in septic newborns. Pediatr Res.](#)  
12 [2001;50\(6\):756.](#)  
13

14 40. [Fulia F, Gitto E, Cuzzocrea S, Reiter RJ, Dugo L, Gitto P, et al. Increased levels](#)  
15 [of malondialdehyde and nitrite/nitrate in the blood of asphyxiated](#)  
16 [newborns: reduction by melatonin. J Pineal Res. 2001 Nov;31\(4\):343-9.](#)  
17

18 41. [Gitto E, Aversa S, Salpietro CD, Barberi I, Arrigo T, Trimarchi G, et al. Pain in](#)  
19 [neonatal intensive care: role of melatonin as an analgesic antioxidant. J](#)  
20 [Pineal Res \[Internet\]. \[cited 2012 Feb 13\].](#)  
21

22 42. [Tamura H, Takasaki A, Miwa I, Taniguchi K, Maekawa R, Asada H, et al.](#)  
23 [Oxidative stress impairs oocyte quality and melatonin protects oocytes](#)  
24 [from free radical damage and improves fertilization rate. J Pineal Res. 2008](#)  
25 [Apr;44\(3\):280-7.](#)  
26  
27  
28  
29  
30  
31  
32  
33  
34  
35  
36  
37  
38  
39  
40  
41  
42  
43  
44  
45  
46  
47  
48  
49  
50  
51  
52  
53  
54  
55  
56  
57  
58  
59  
60
